# Supplementary material for: First total synthesis of Debilisone C
Source: Royal Society of Chemistry journal article supplement (doi:10.1039/c2ob26329g), 2012-10-04

## Supporting Information

# First Total Synthesis of Debilisone C

**Bishwajit Saikia, Thongam Joymati Devi, Nabin C. Barua\***

Natural Products Chemistry Division, CSIR-North East Institute of Science & Technology, Jorhat-785006,

Assam, India

E-mail: ncbarua2000@yahoo.co.in

Tel No.: 91-376-2371283, Fax No.: 91-376-2370011

## CONTENTS

|                                                                             |           |
|-----------------------------------------------------------------------------|-----------|
| 1. $^1\text{H}$ & $^{13}\text{C}$ NMR SPECTRUM OF COMPOUND 5 .....          | S1 & S2   |
| 2. $^1\text{H}$ & $^{13}\text{C}$ NMR SPECTRUM OF COMPOUND 14 .....         | S3 & S4   |
| 3. $^1\text{H}$ & $^{13}\text{C}$ NMR SPECTRUM OF COMPOUND 15 .....         | S5 & S6   |
| 4. $^1\text{H}$ & $^{13}\text{C}$ NMR SPECTRUM OF COMPOUND 16 .....         | S7 & S8   |
| 5. $^1\text{H}$ & $^{13}\text{C}$ NMR SPECTRUM OF COMPOUND 17 .....         | S9 & S10  |
| 6. $^1\text{H}$ & $^{13}\text{C}$ NMR SPECTRUM OF COMPOUND 7 .....          | S11 & S12 |
| 7. $^1\text{H}$ & $^{13}\text{C}$ NMR SPECTRUM OF COMPOUND 2 .....          | S13 & S14 |
| 8. $^1\text{H}$ & $^{13}\text{C}$ NMR SPECTRUM OF COMPOUND 18 .....         | S15 & S16 |
| 9. $^1\text{H}$ & $^{13}\text{C}$ NMR SPECTRUM OF COMPOUND 10 .....         | S17 & S18 |
| 10. $^1\text{H}$ & $^{13}\text{C}$ NMR SPECTRUM OF COMPOUND 12 .....        | S19 & S20 |
| 11. $^1\text{H}$ & $^{13}\text{C}$ NMR SPECTRUM OF COMPOUND 3 .....         | S21 & S22 |
| 12. $^1\text{H}$ & $^{13}\text{C}$ NMR SPECTRUM OF COMPOUND 19(major) ..... | S23 & S24 |
| 13. $^1\text{H}$ & $^{13}\text{C}$ NMR SPECTRUM OF COMPOUND 20(minor) ..... | S25 & S26 |
| 14. $^1\text{H}$ & $^{13}\text{C}$ NMR SPECTRUM OF COMPOUND 21(major) ..... | S27 & S28 |
| 15. $^1\text{H}$ & $^{13}\text{C}$ NMR SPECTRUM OF COMPOUND 22(minor) ..... | S29 & S30 |

Recorded by: Dr. P.J. Saikia  
Name of Sample: BS-67(a)  
Spectrum No.: 2834

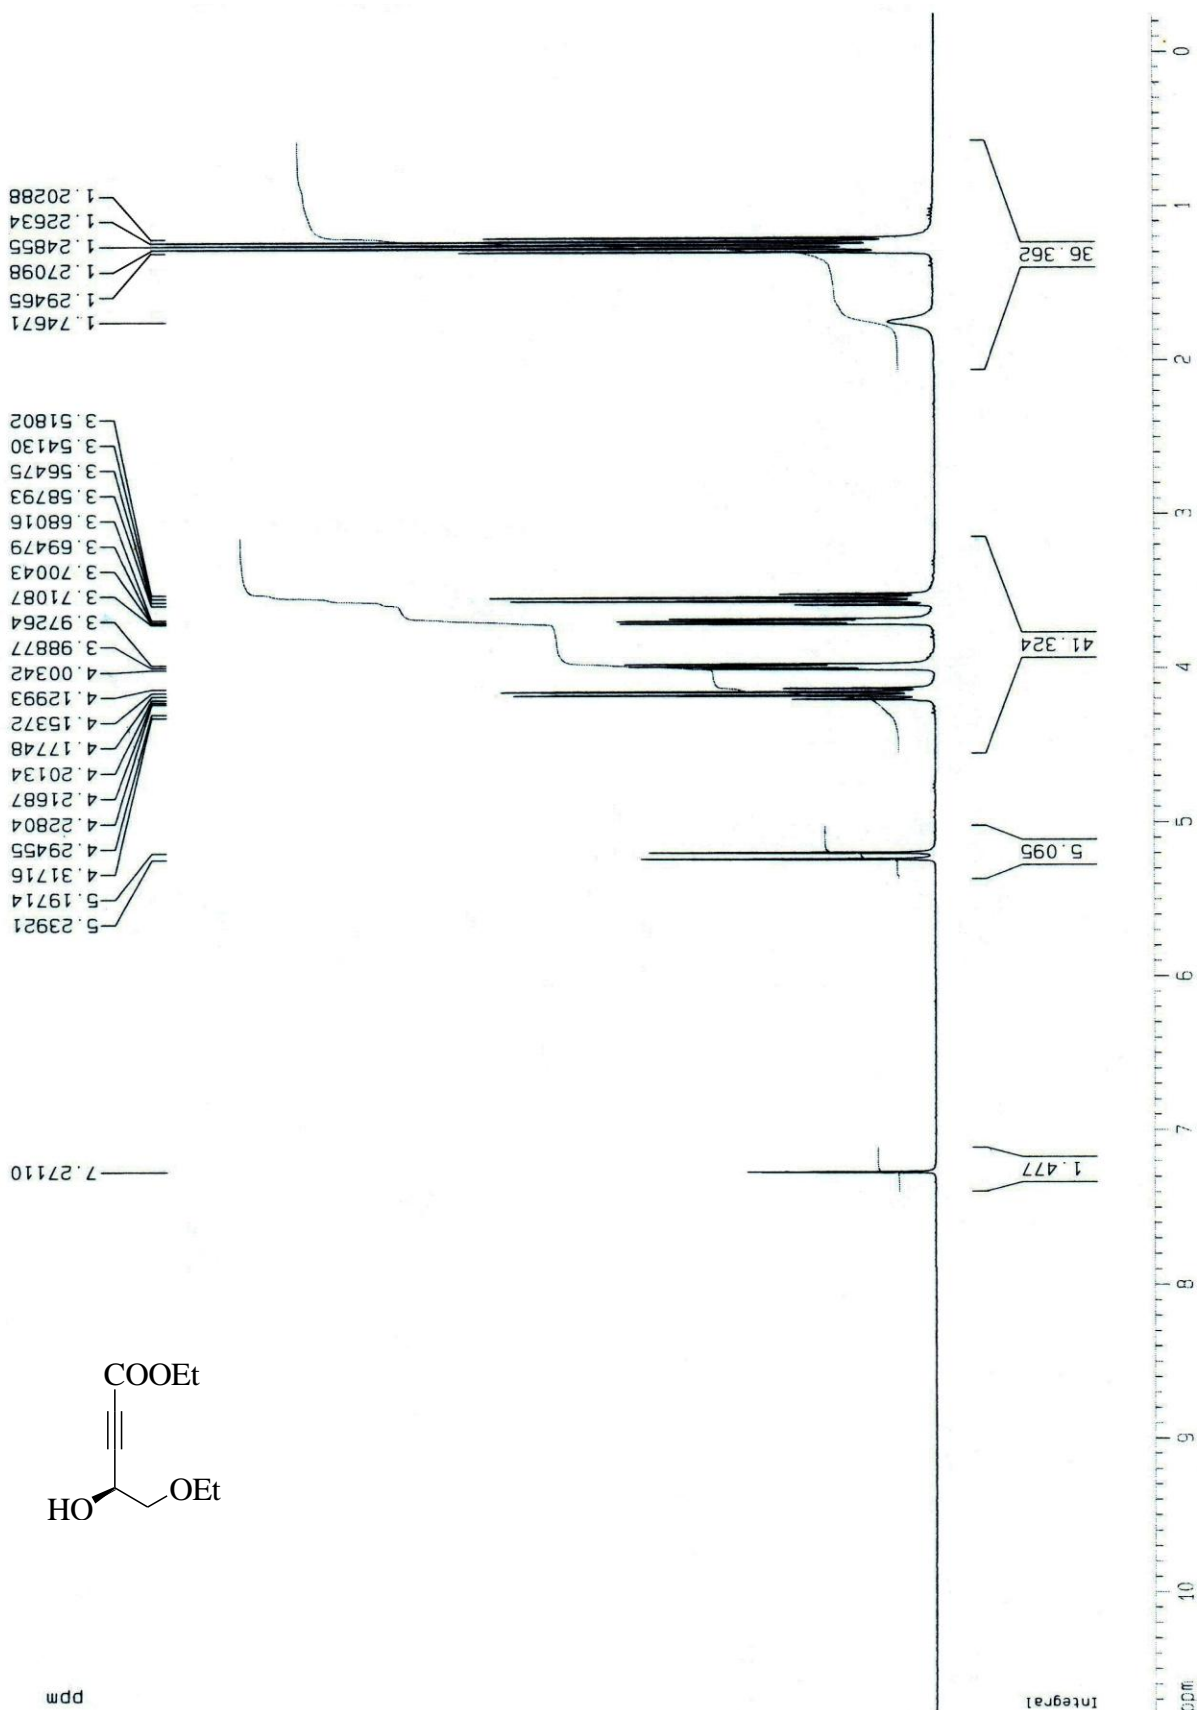

Recorded by: Dr. P.J. Saikia  
Name of Sample: BS-72(b)  
Spectrum No.: 2476

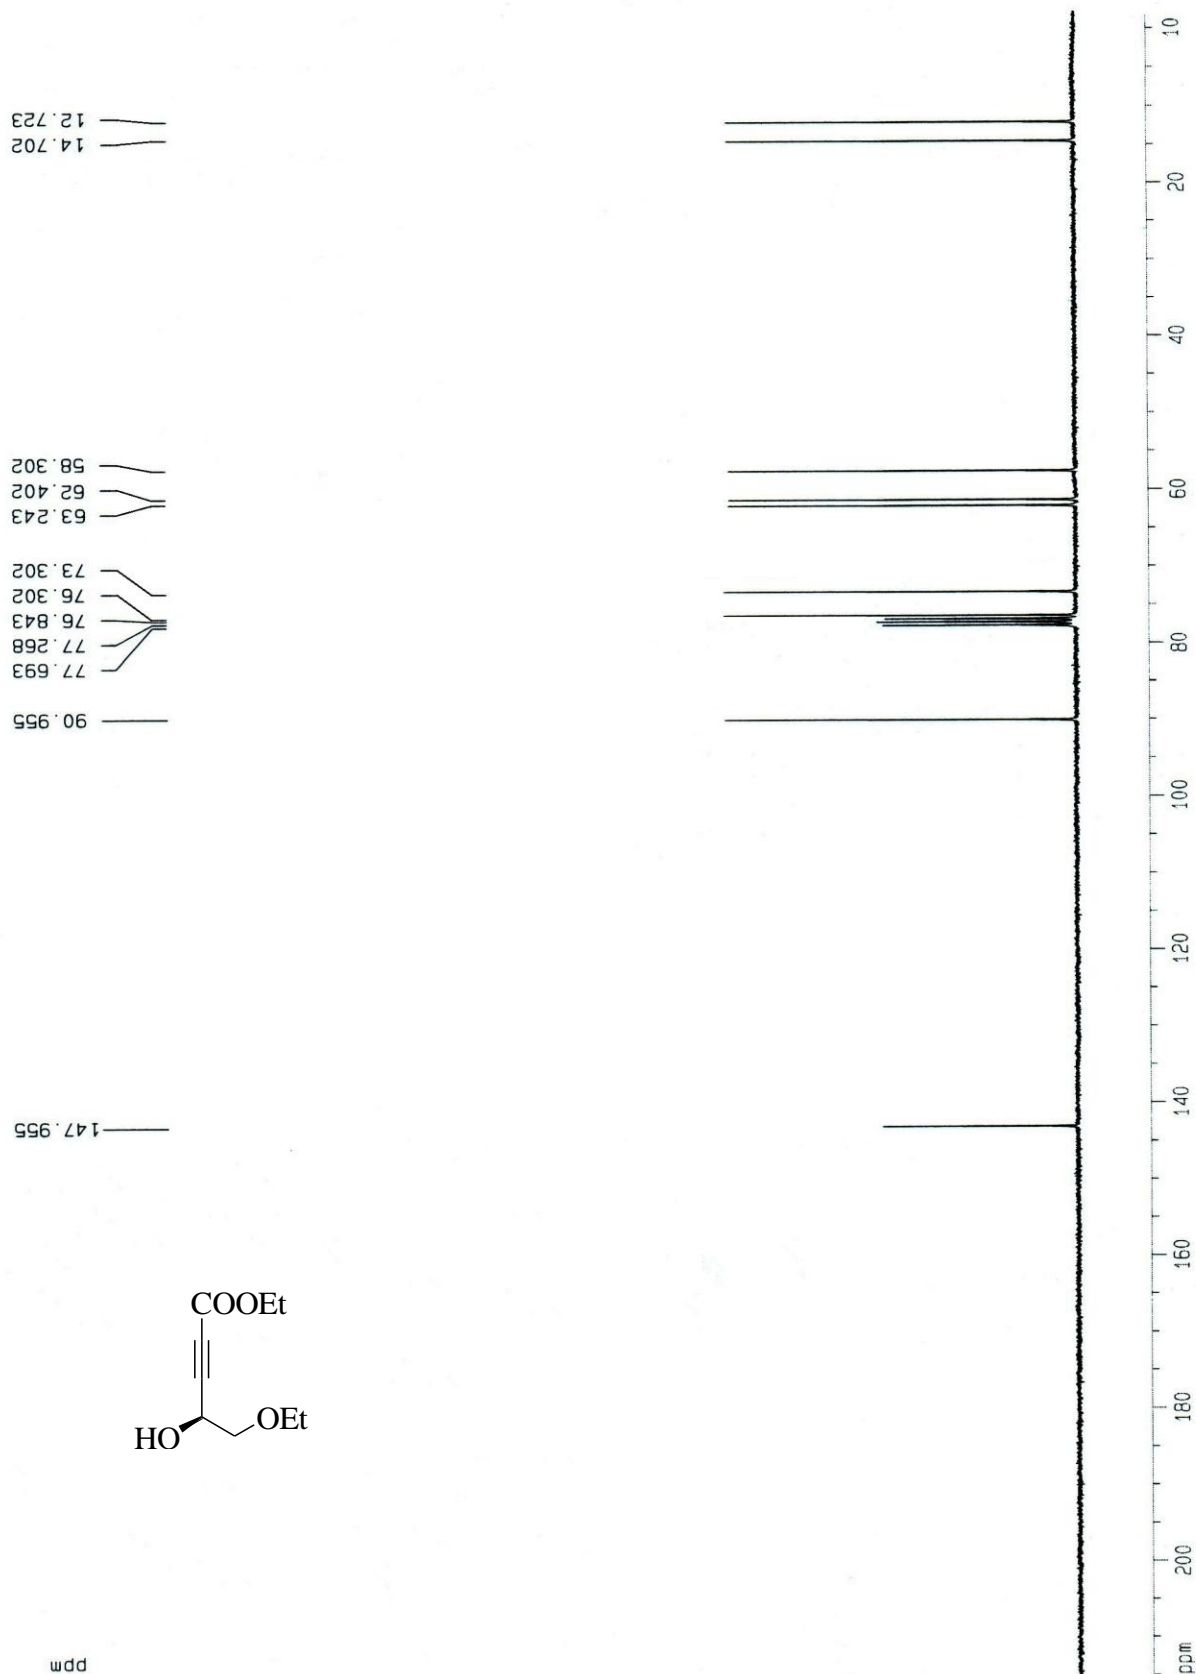

Recorded by: Dr. P.J. Saikia  
Name of Sample: BS-68-b  
Spectrum No.: 2967

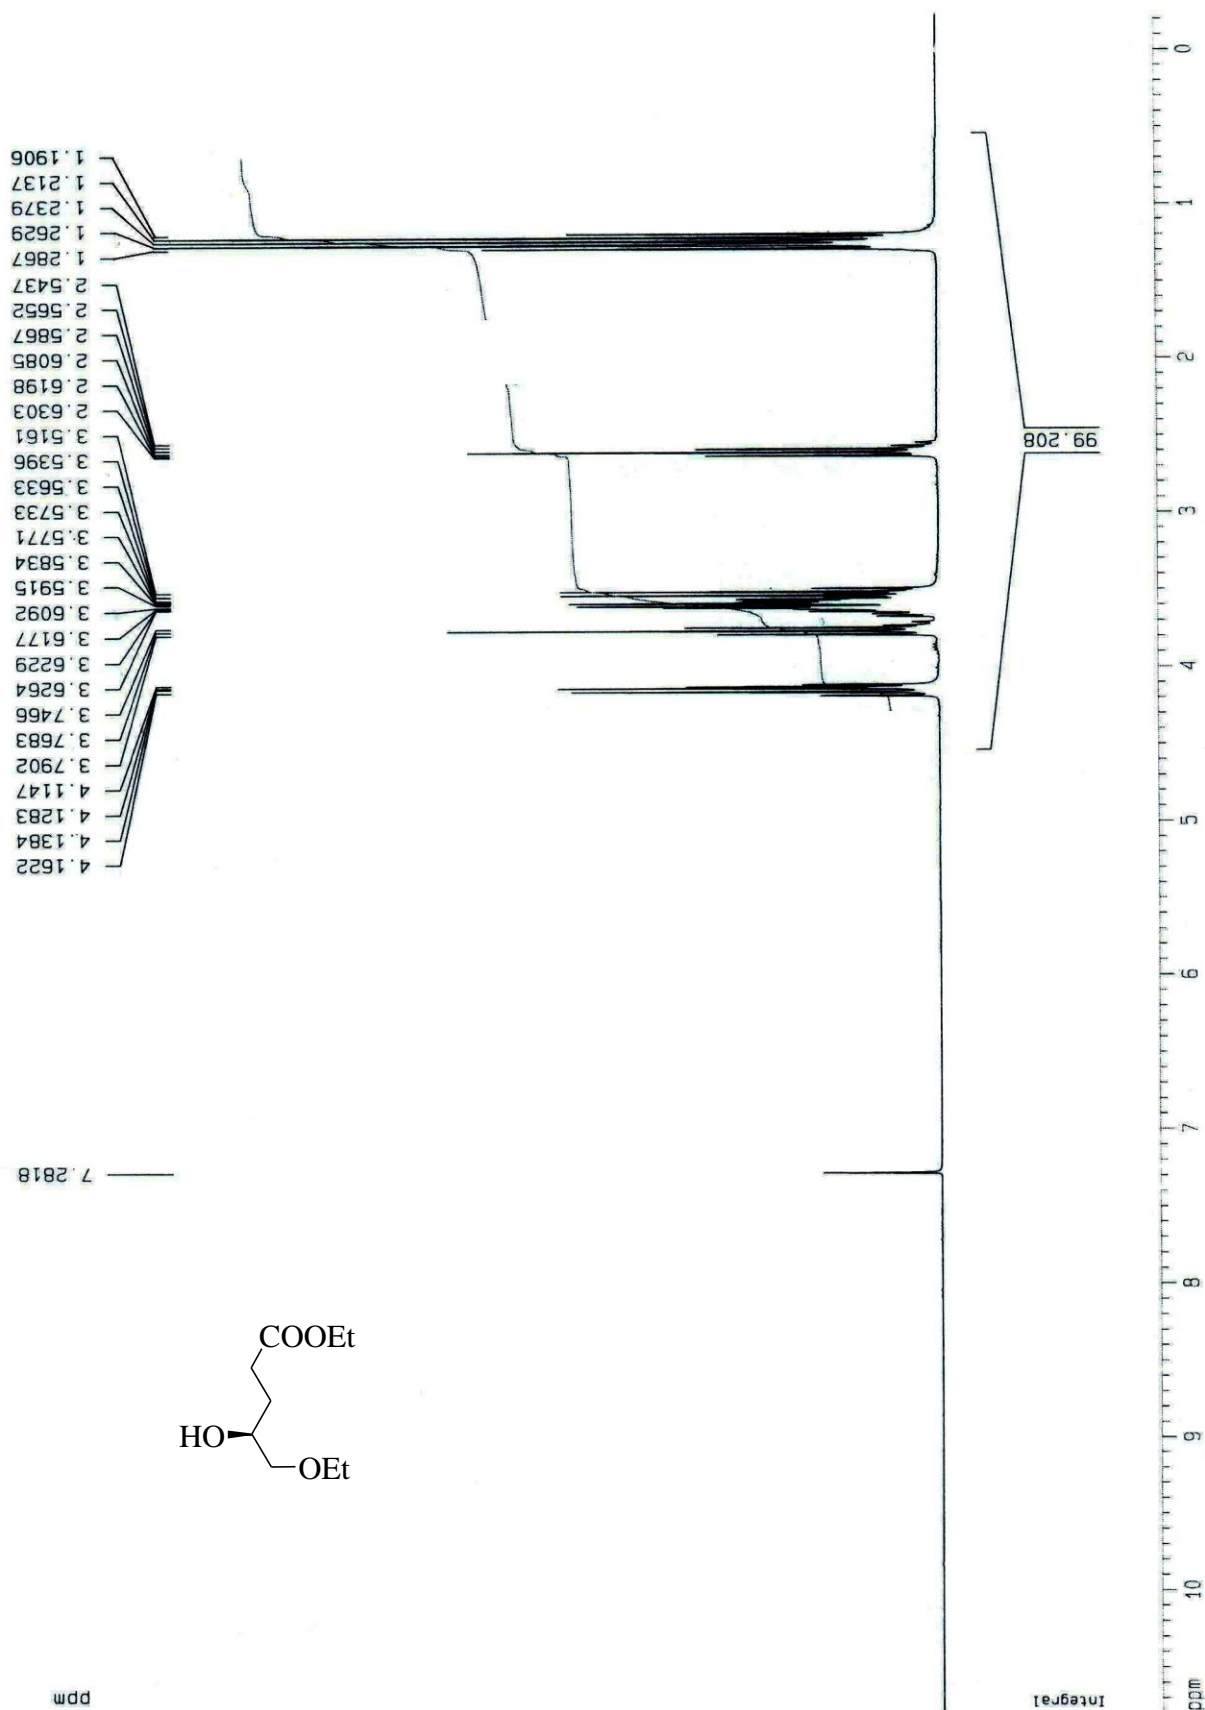

Recorded by: Dr. P.J. Saikia  
Name of Sample: BS-72 (b)  
Spectrum No.: 3097

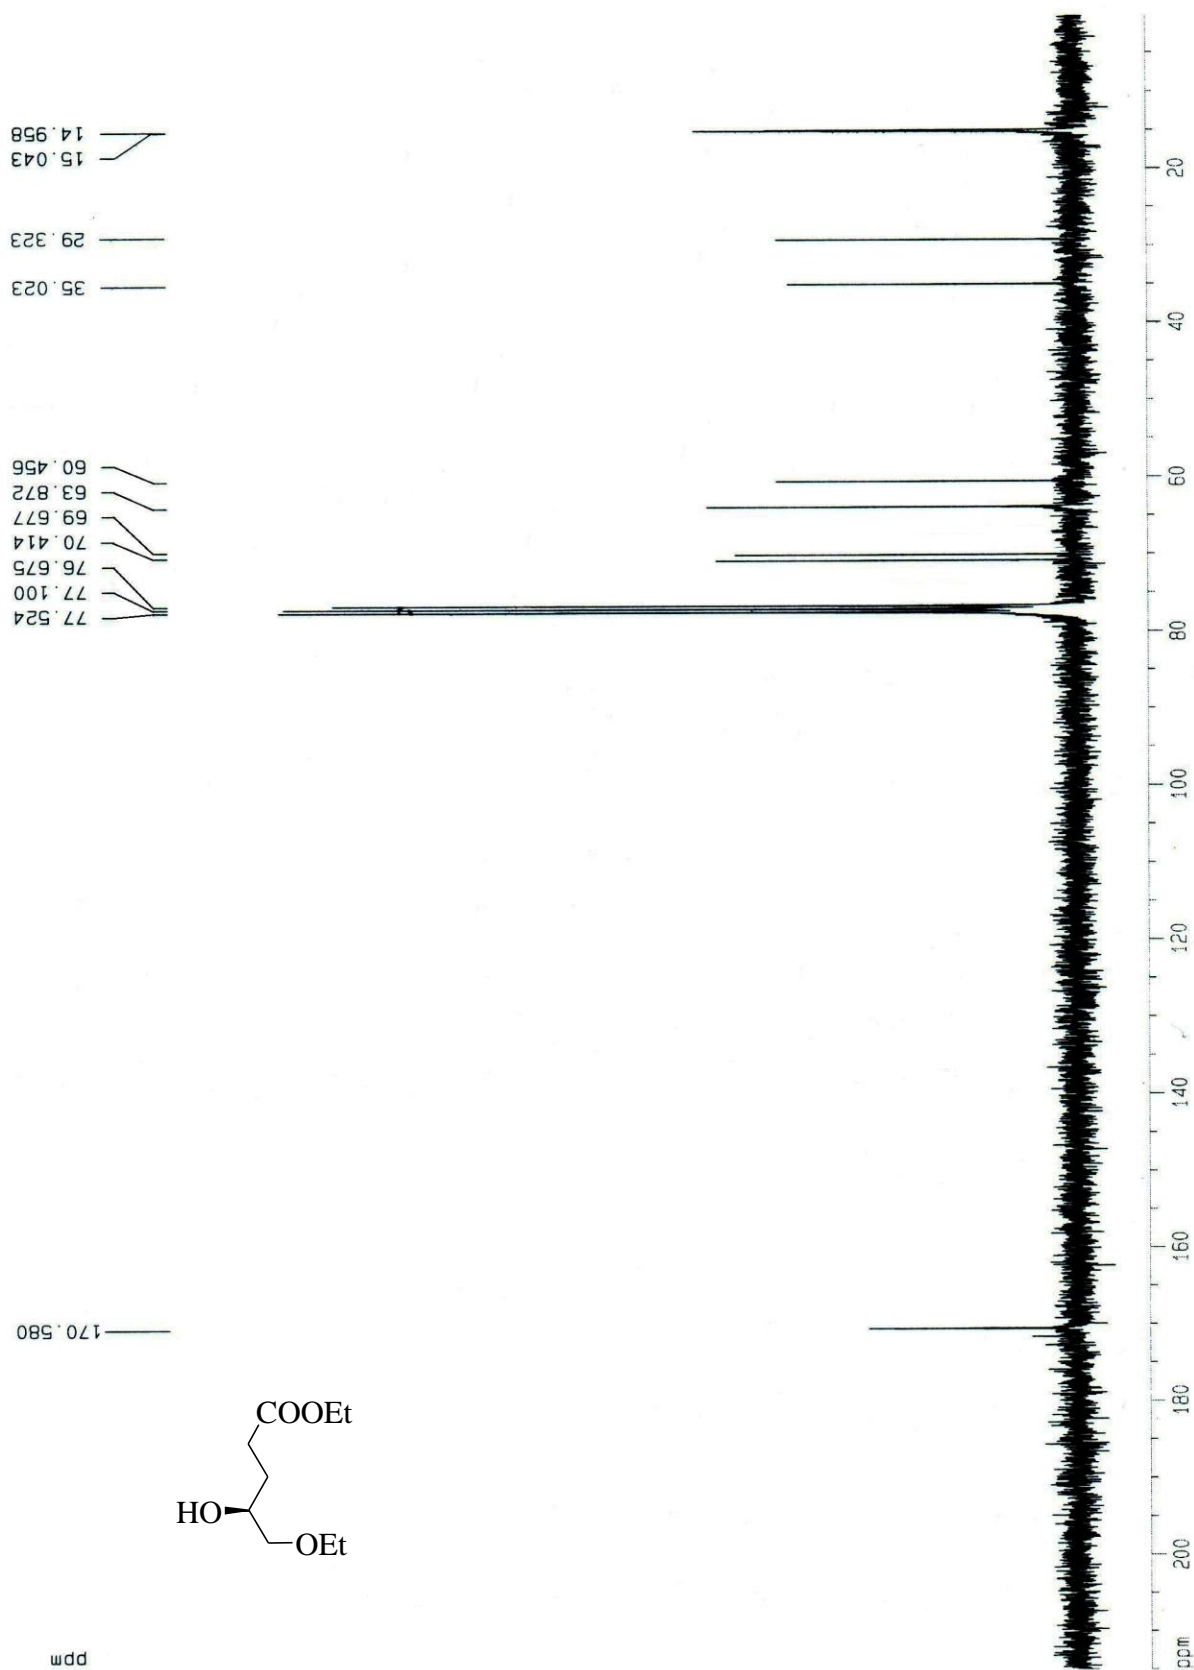

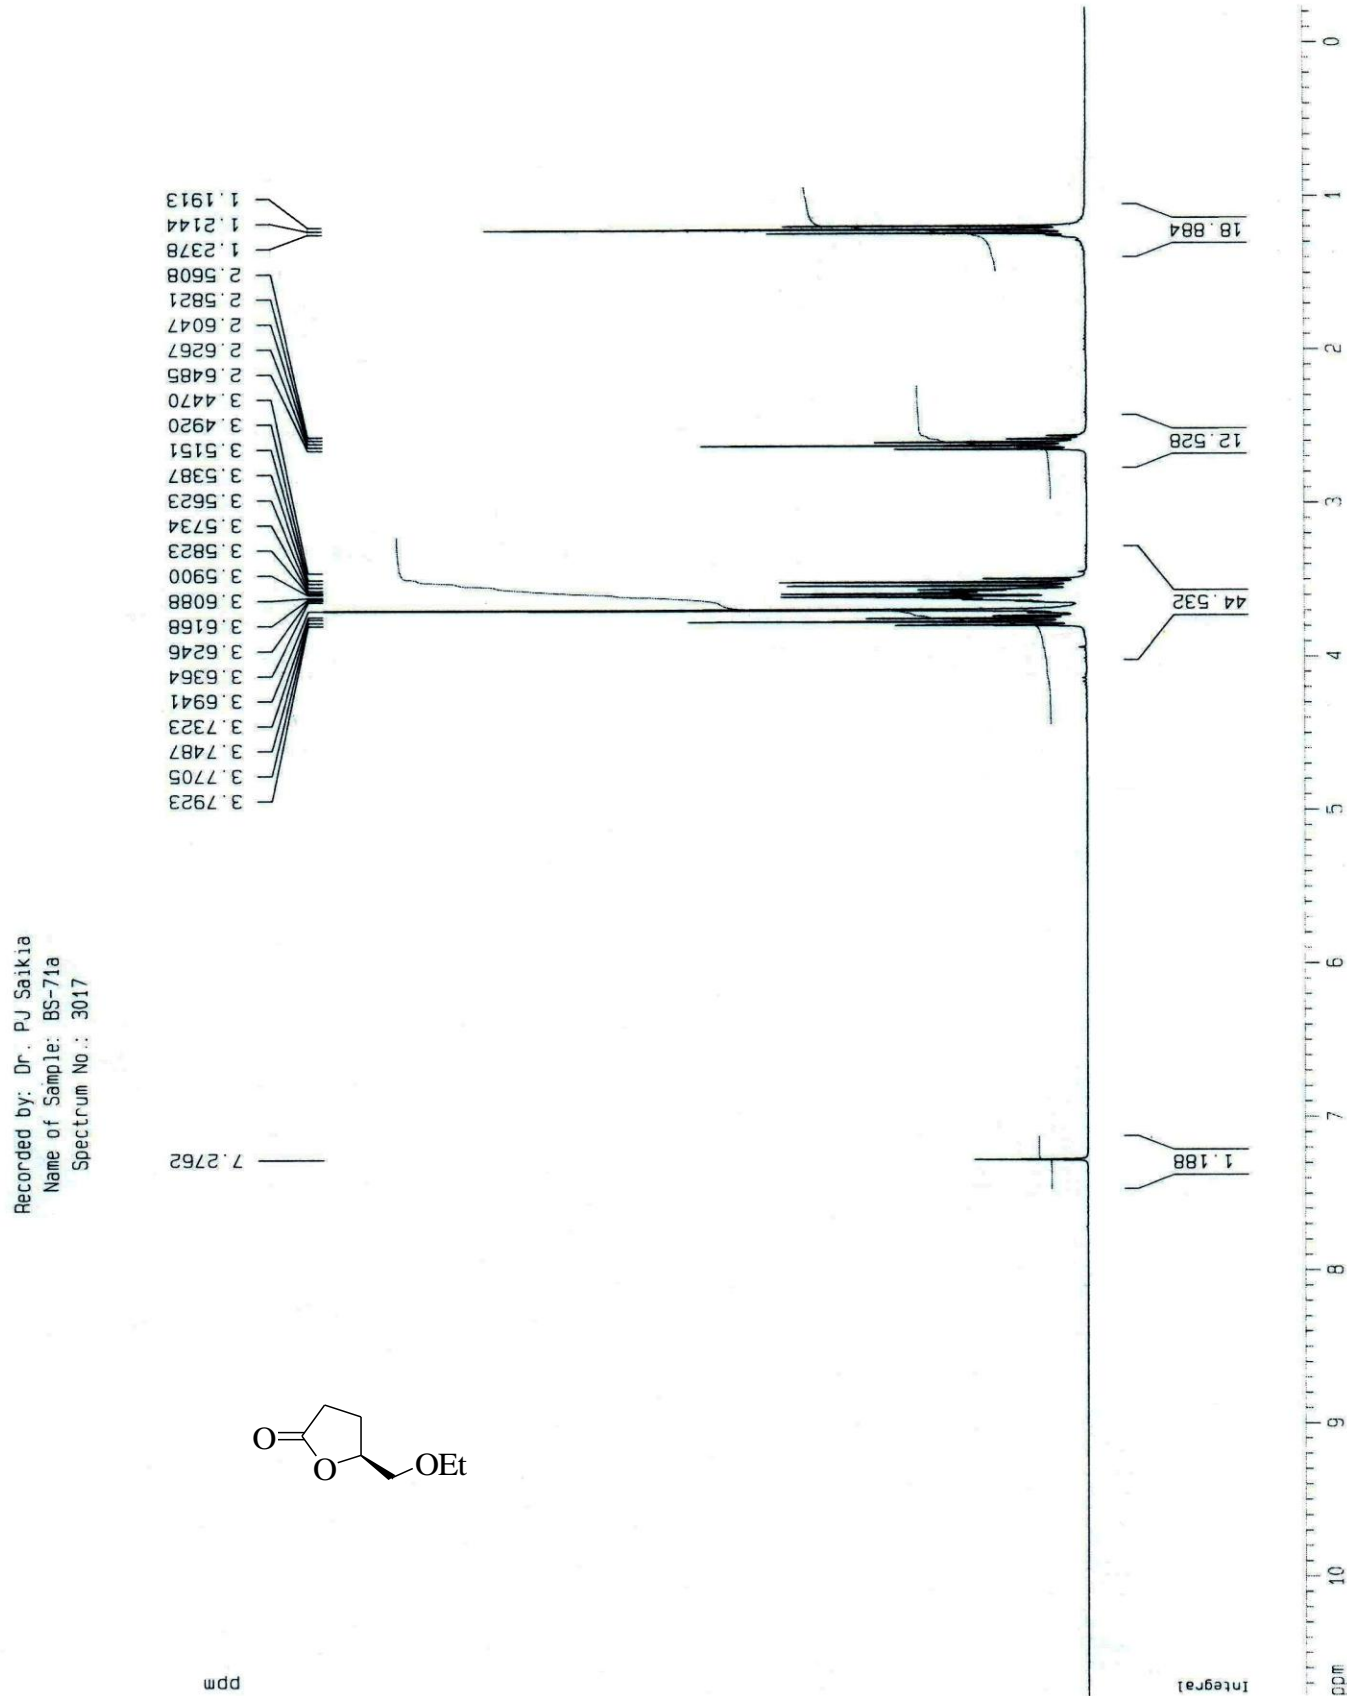

Recorded by: Dr. P.J. Saikia  
Name of Sample: BS-71a  
Spectrum No.: 3045

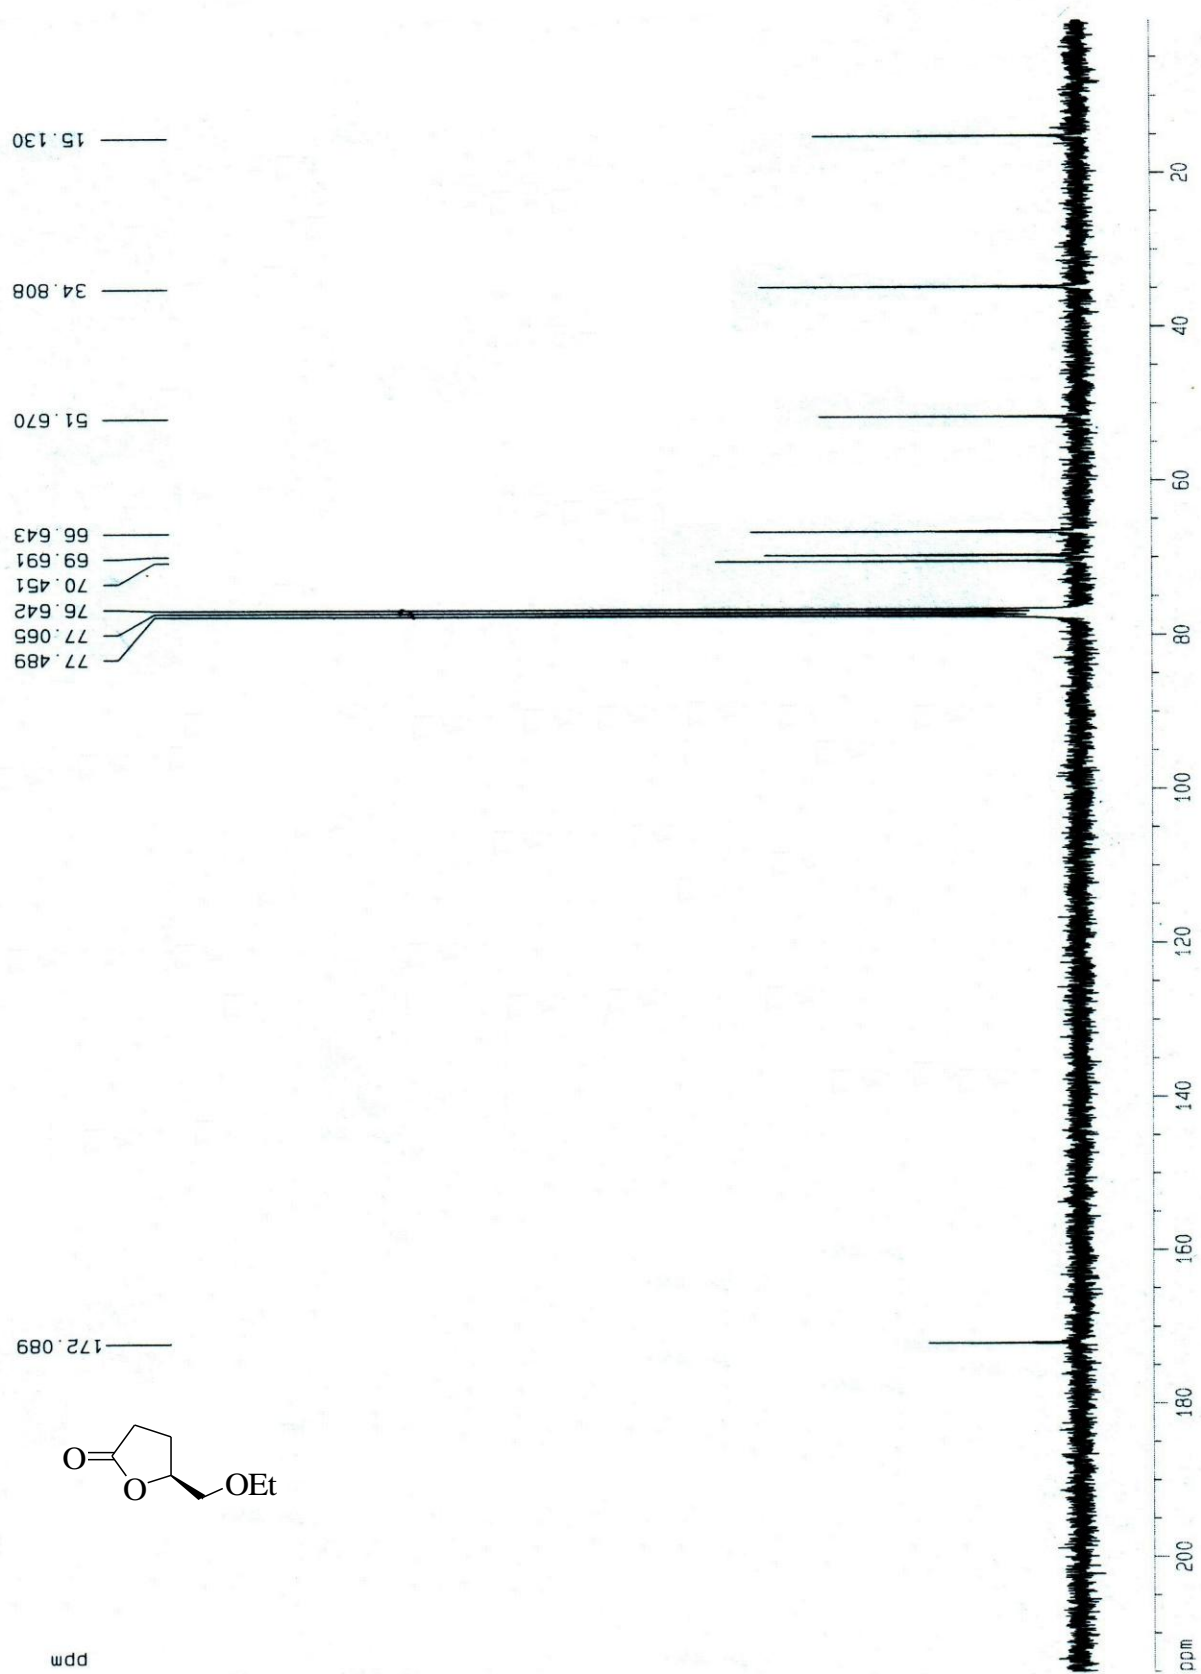



Recorded by: Dr. P.J. Saikia  
Name of Sample: BS-76b  
Spectrum No.: 3407

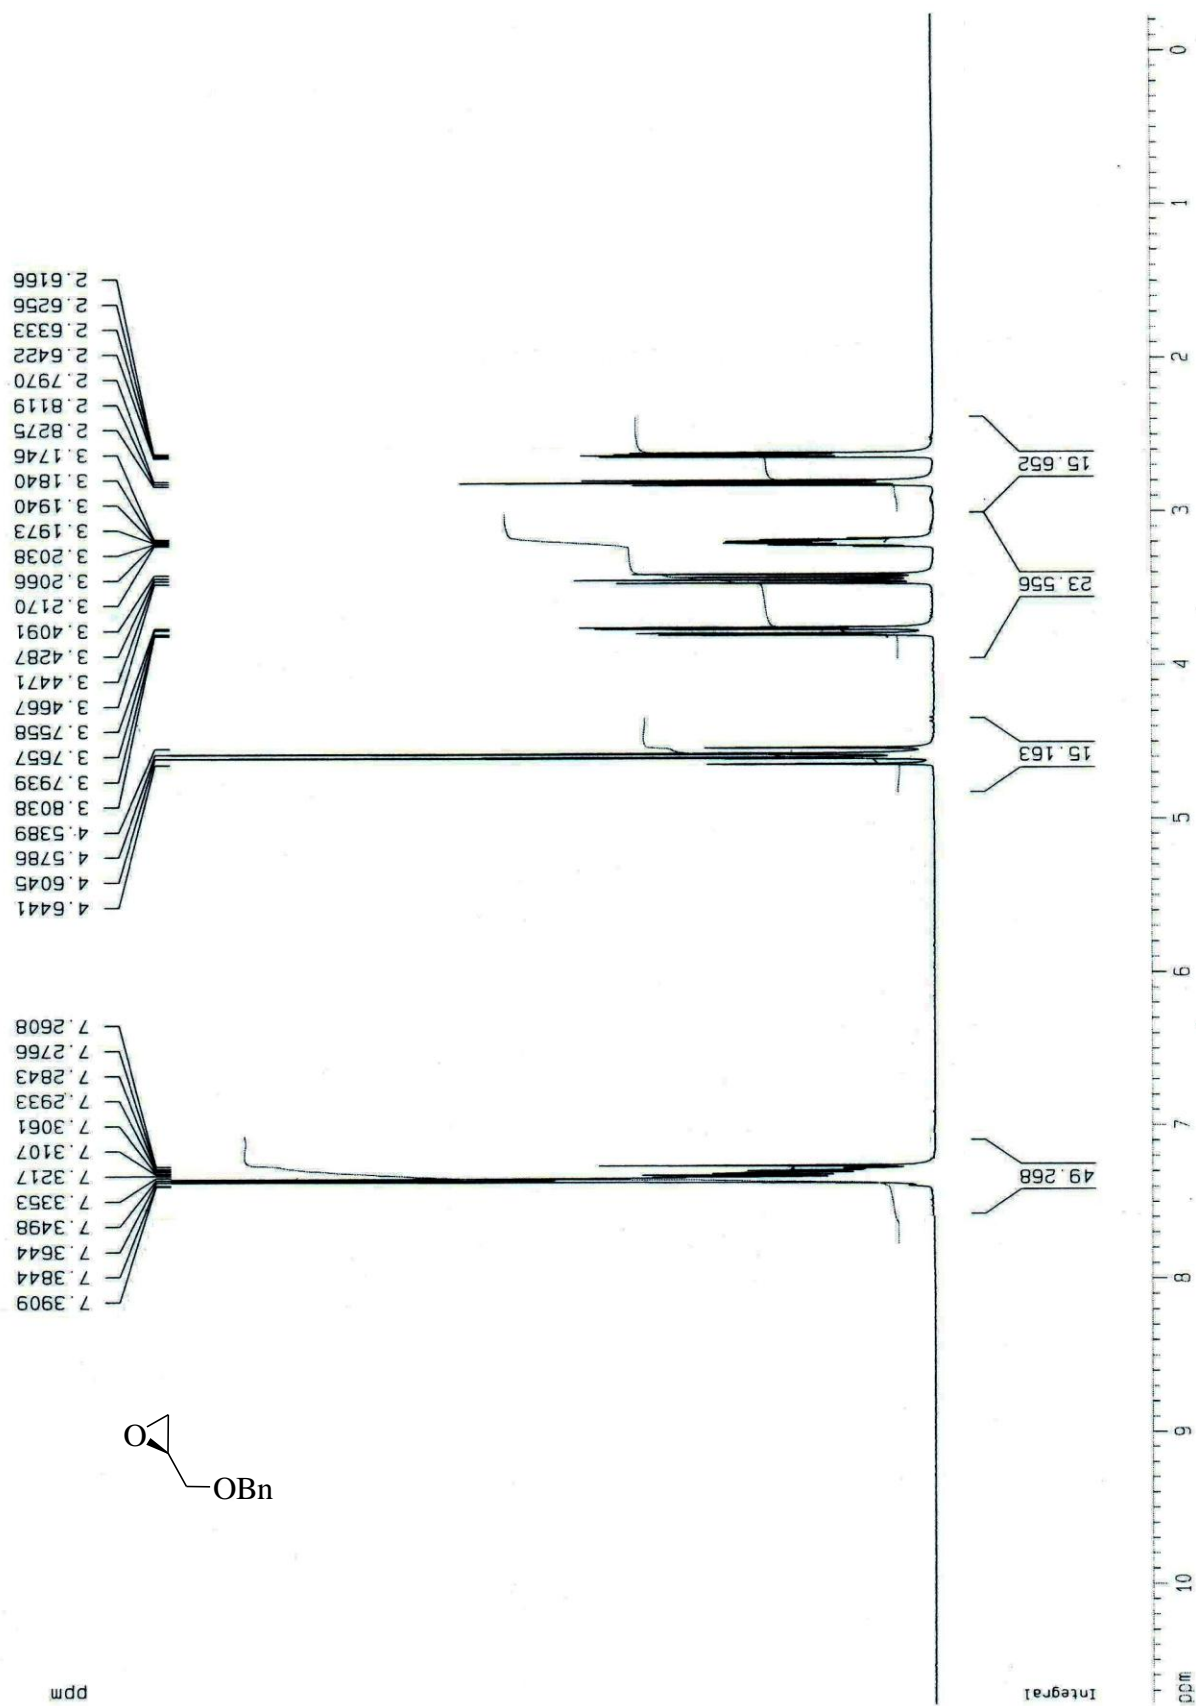



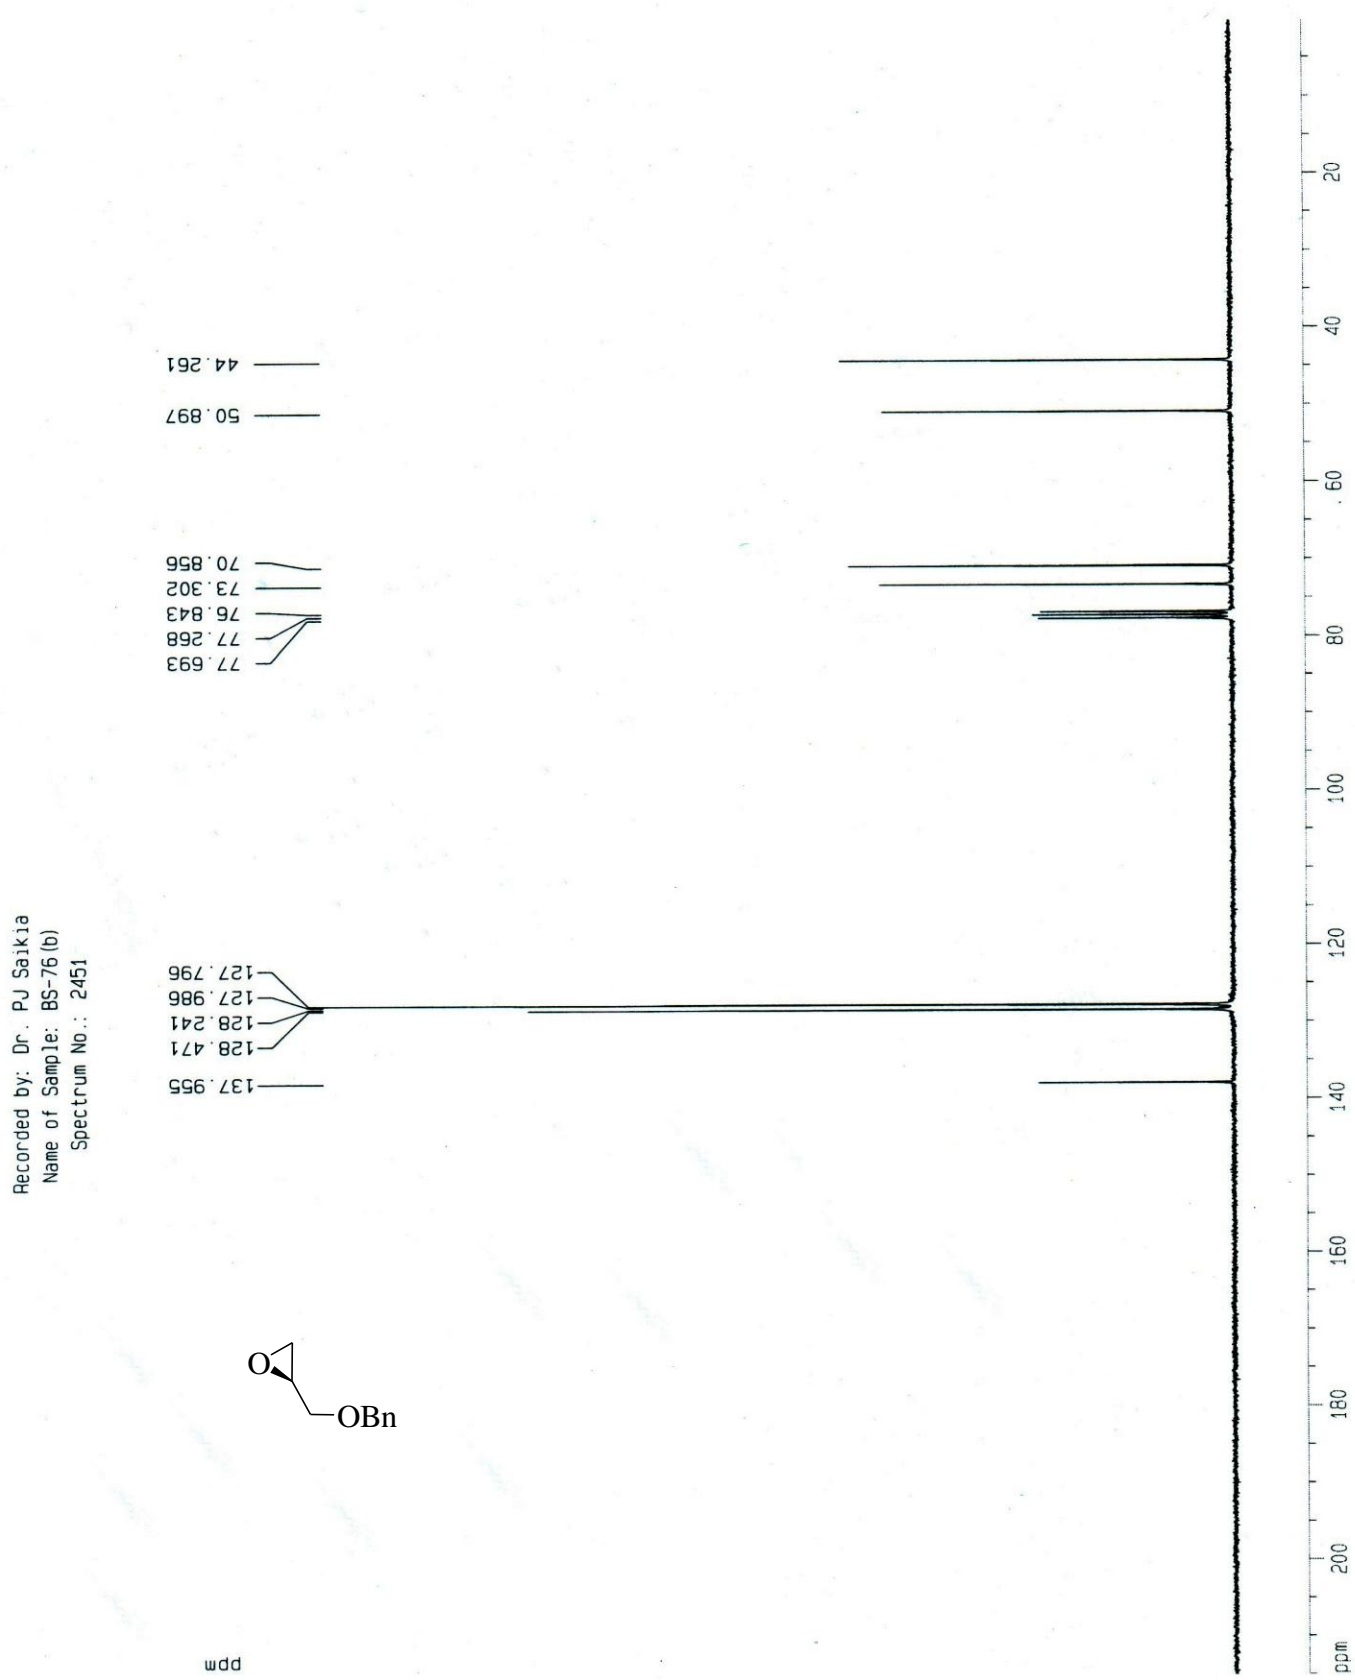

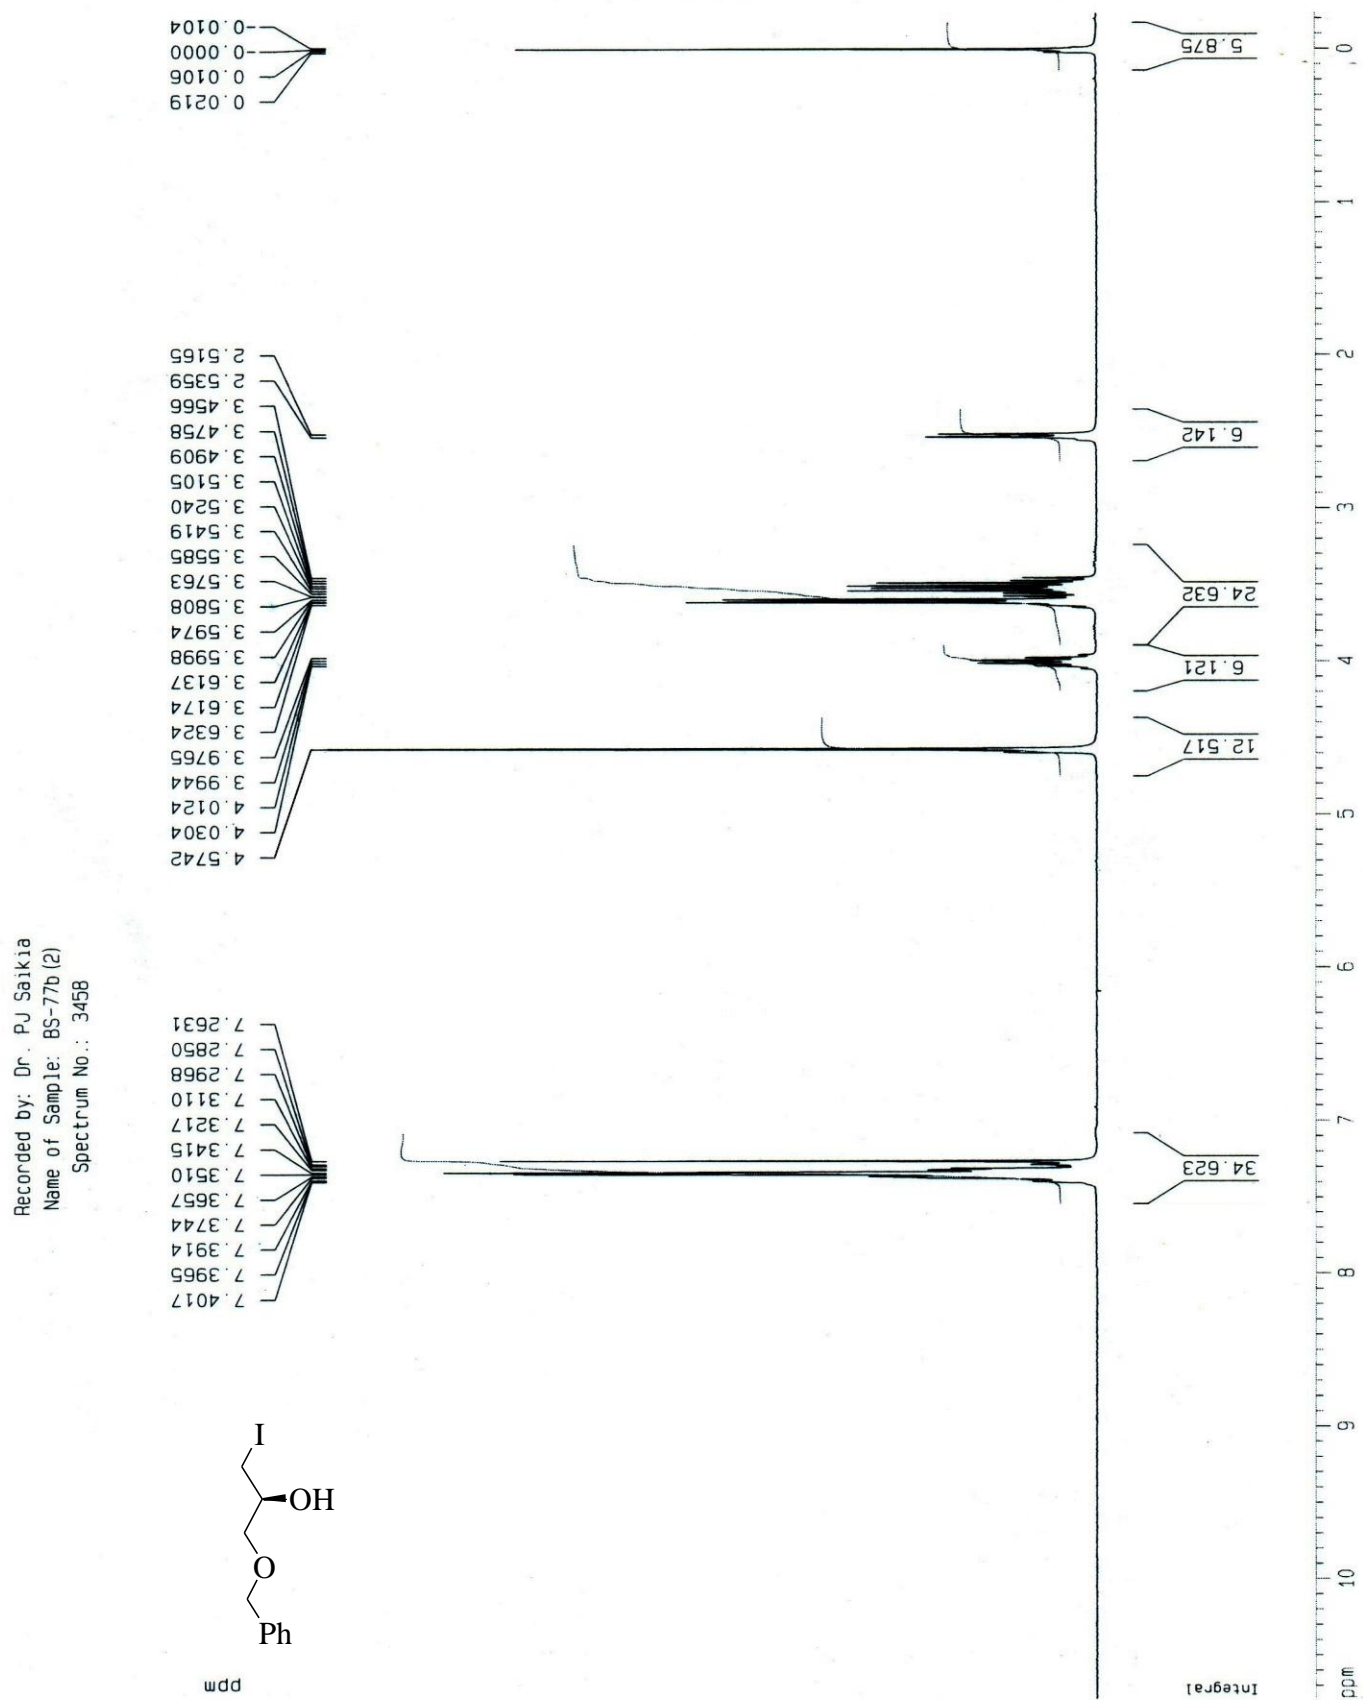

Recorded by: Dr. P.J. Saikia  
Name of Sample: BS-76 (b)  
Spectrum No.: 2451

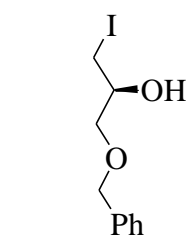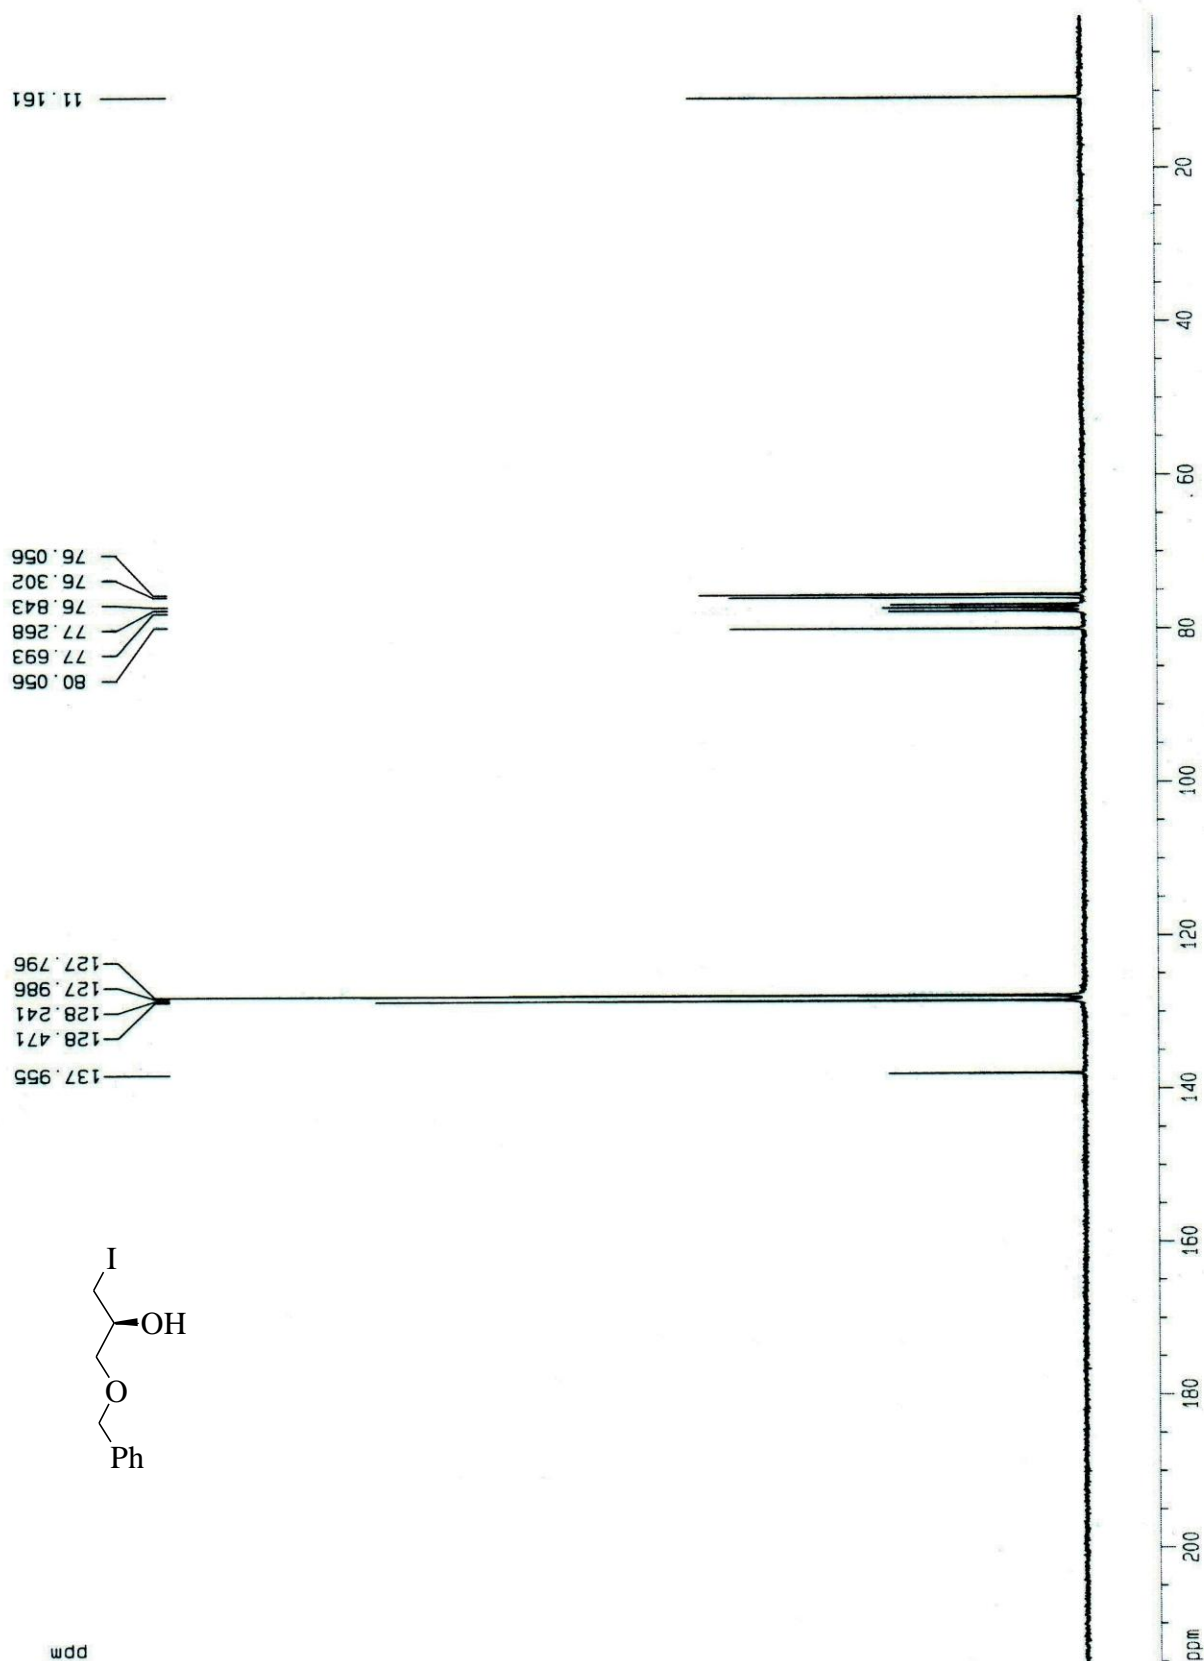

Recorded by: Dr. P.J. Saikia  
Name of Sample: BS-78(a)  
Spectrum No.: 3541

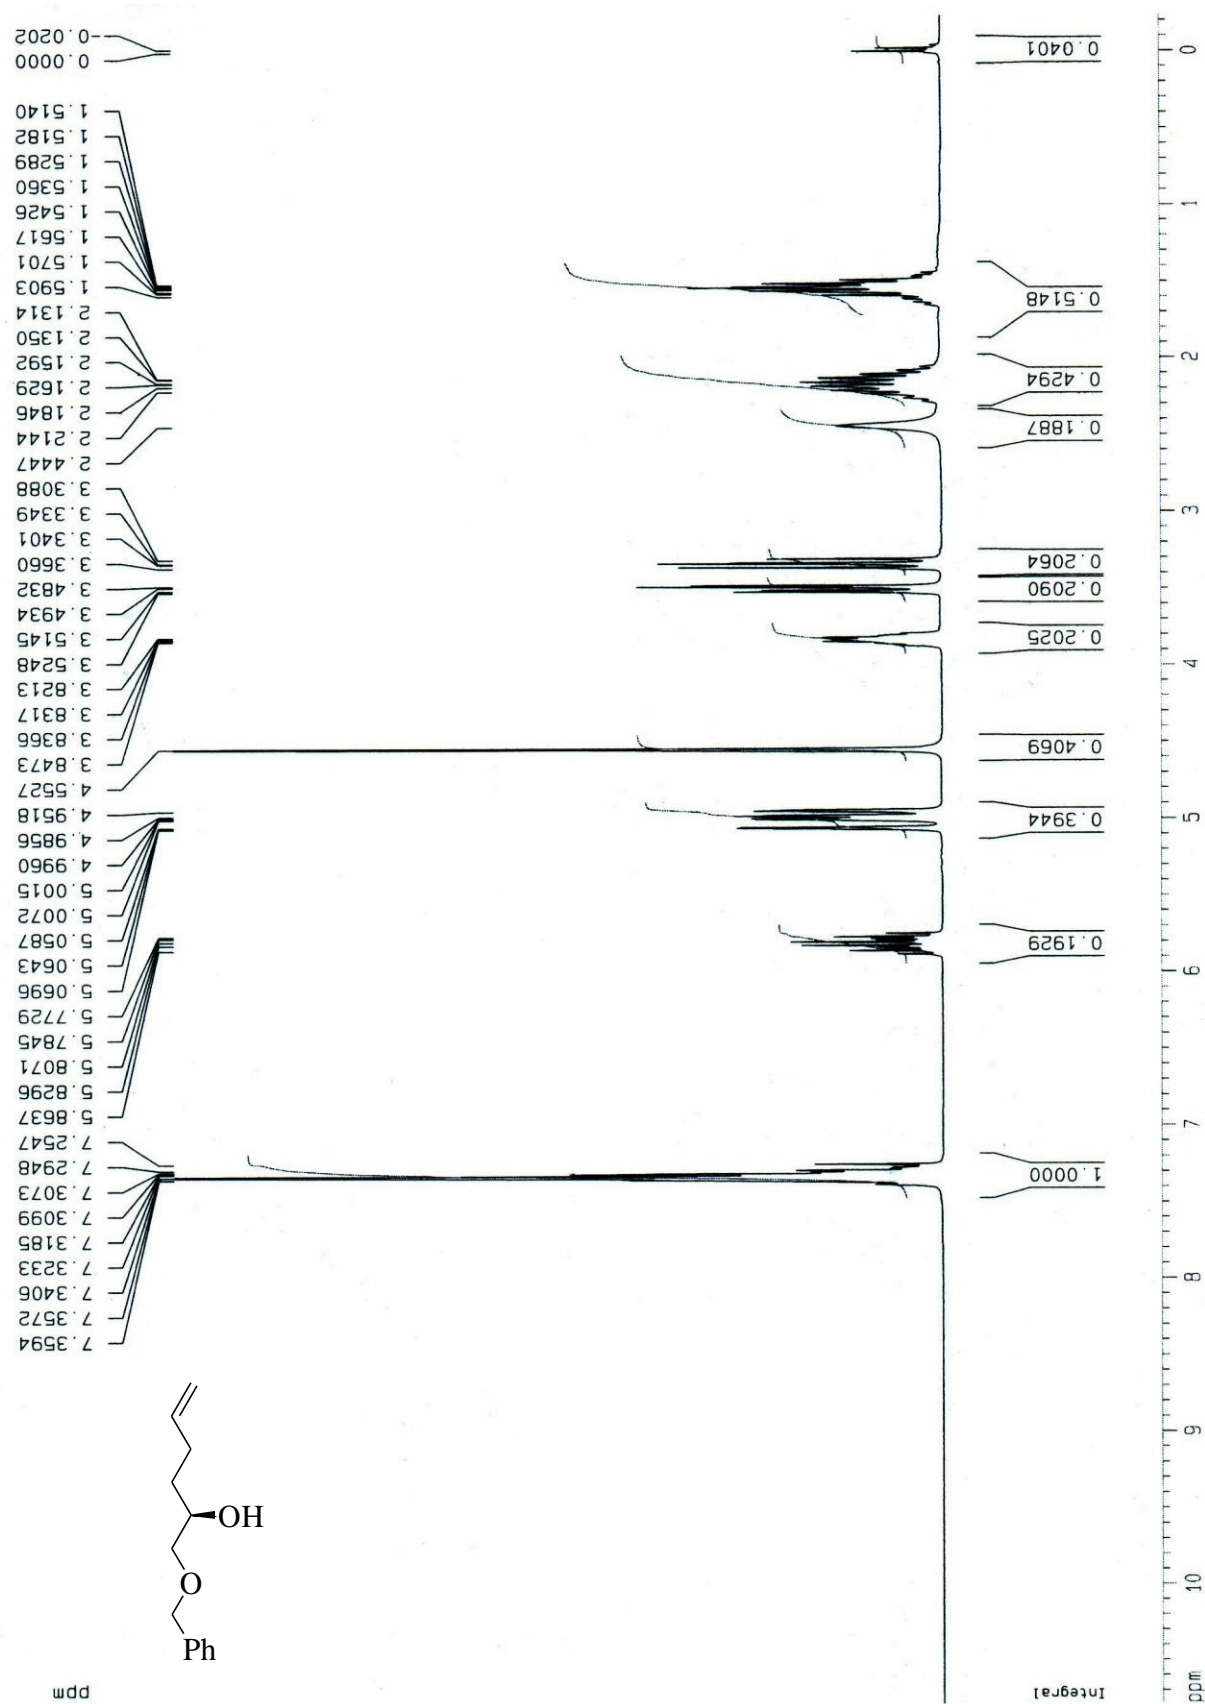

Recorded by: Dr. P.J. Saikia  
Name of Sample: BS-78a  
Spectrum No.: 3562

77.572  
77.148  
76.725  
74.527  
73.549  
73.355  
32.258  
29.783

140.661  
137.643  
128.546  
128.512  
127.969  
127.832  
114.935

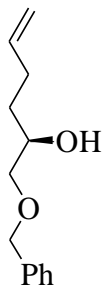

ppm

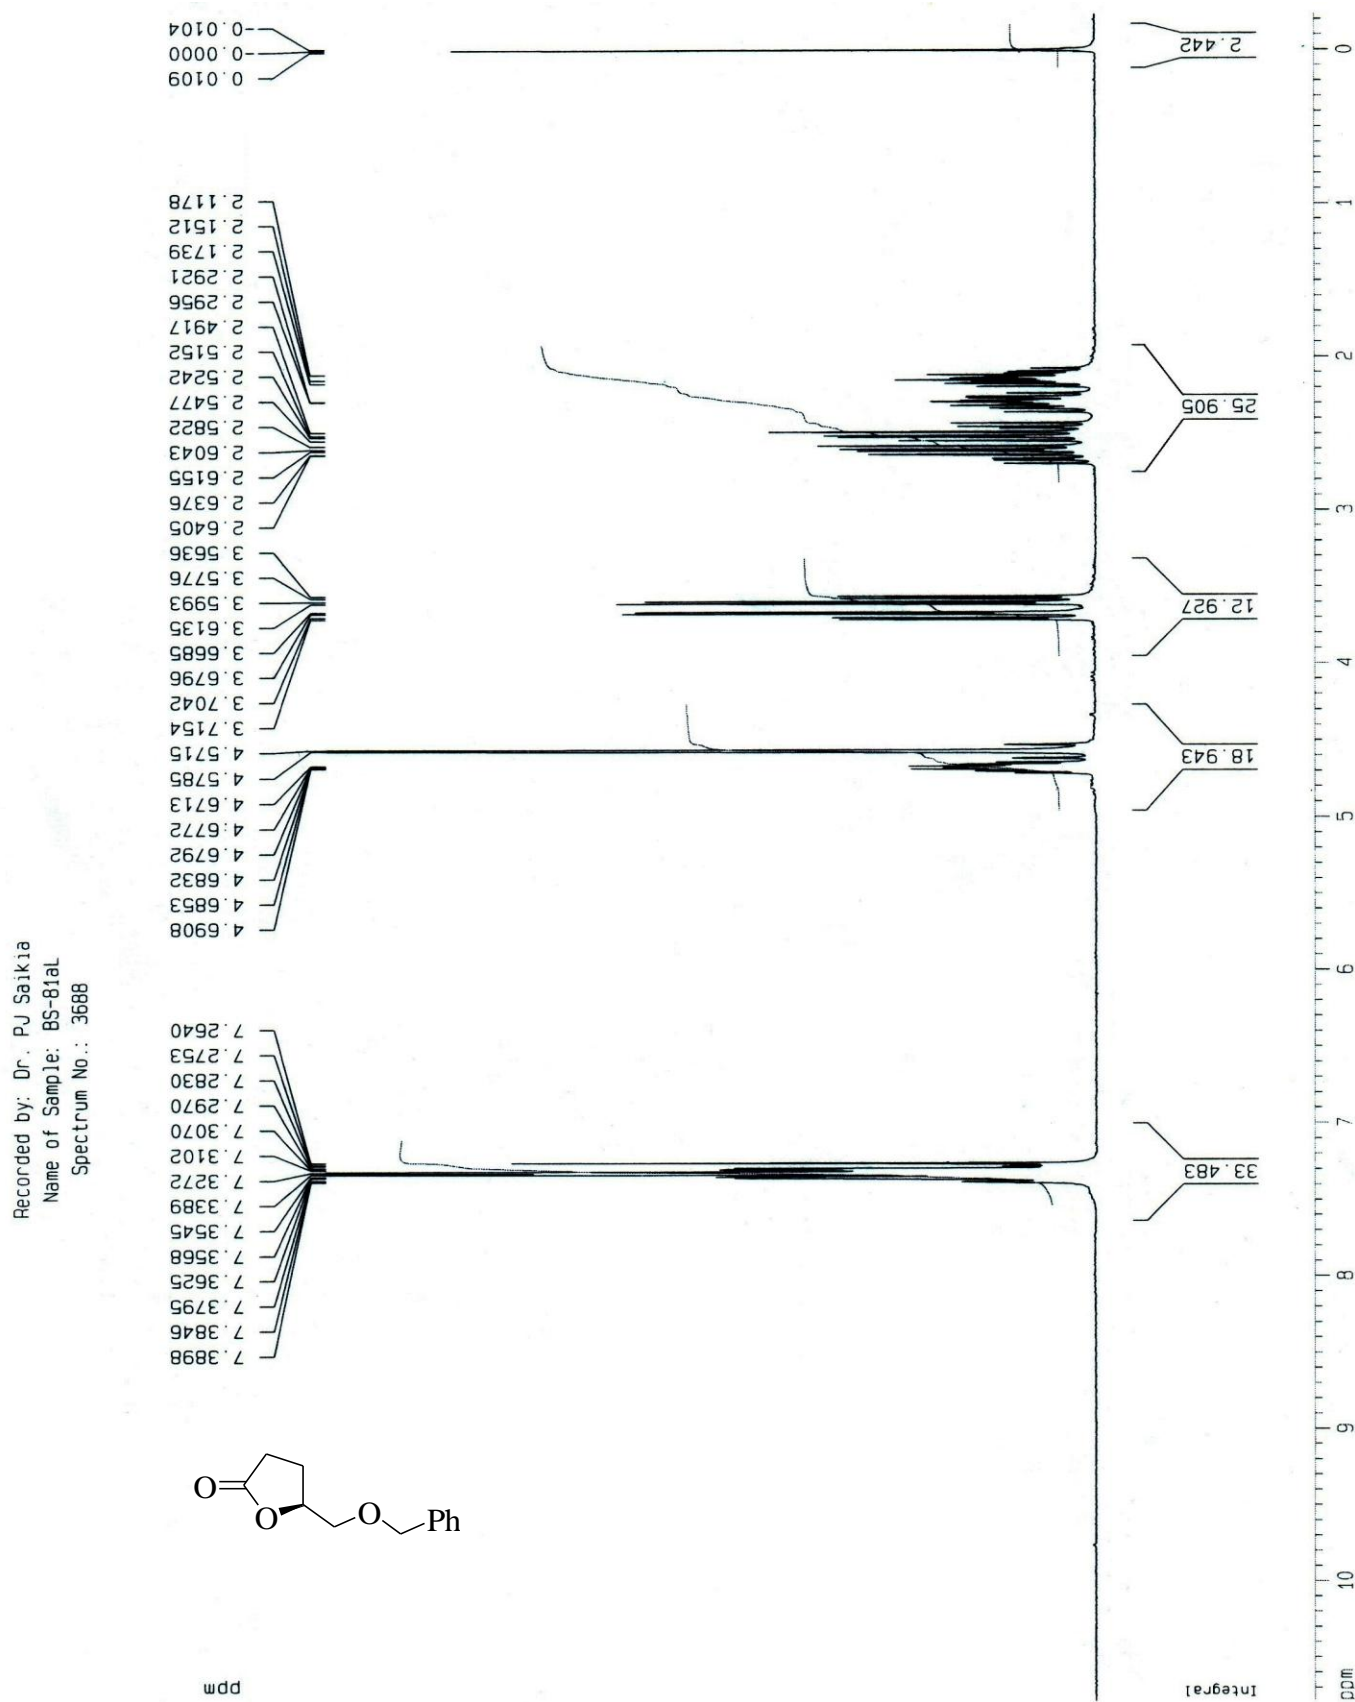



Recorded by: Dr P.J. Saikia  
Name of sample: BS-81aL  
Spectrum No: 3707

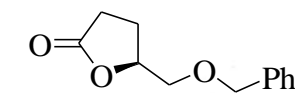

ppm

177.518

137.720

128.496  
127.841  
127.645

79.080  
77.664  
77.239  
76.814  
73.519  
71.599

28.453  
24.098

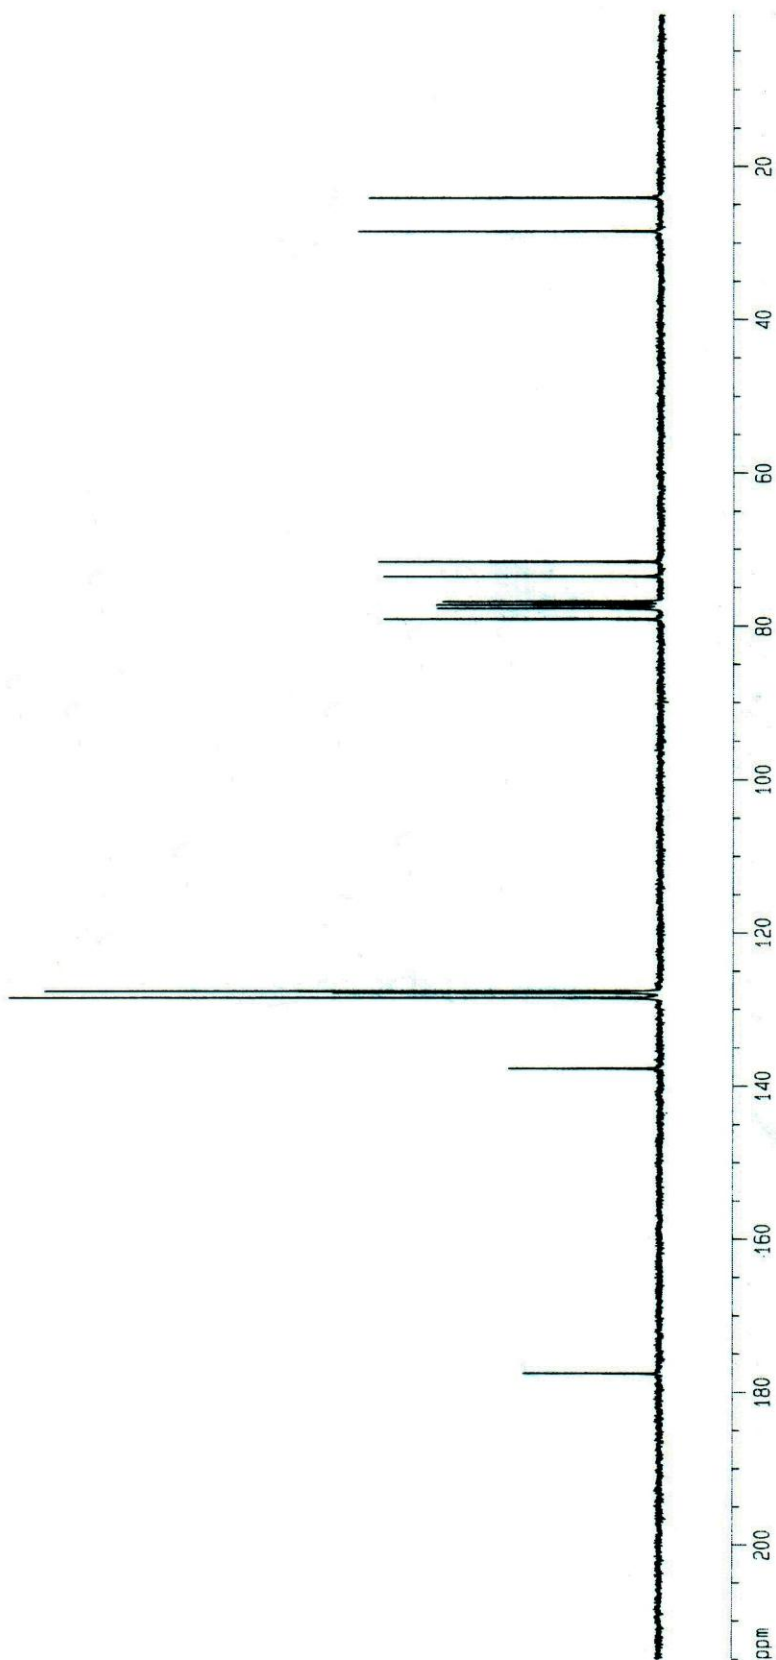



Recorded by: Dr. P.J. Saikia  
Name of Sample: BS-T1  
Spectrum No.: 3689

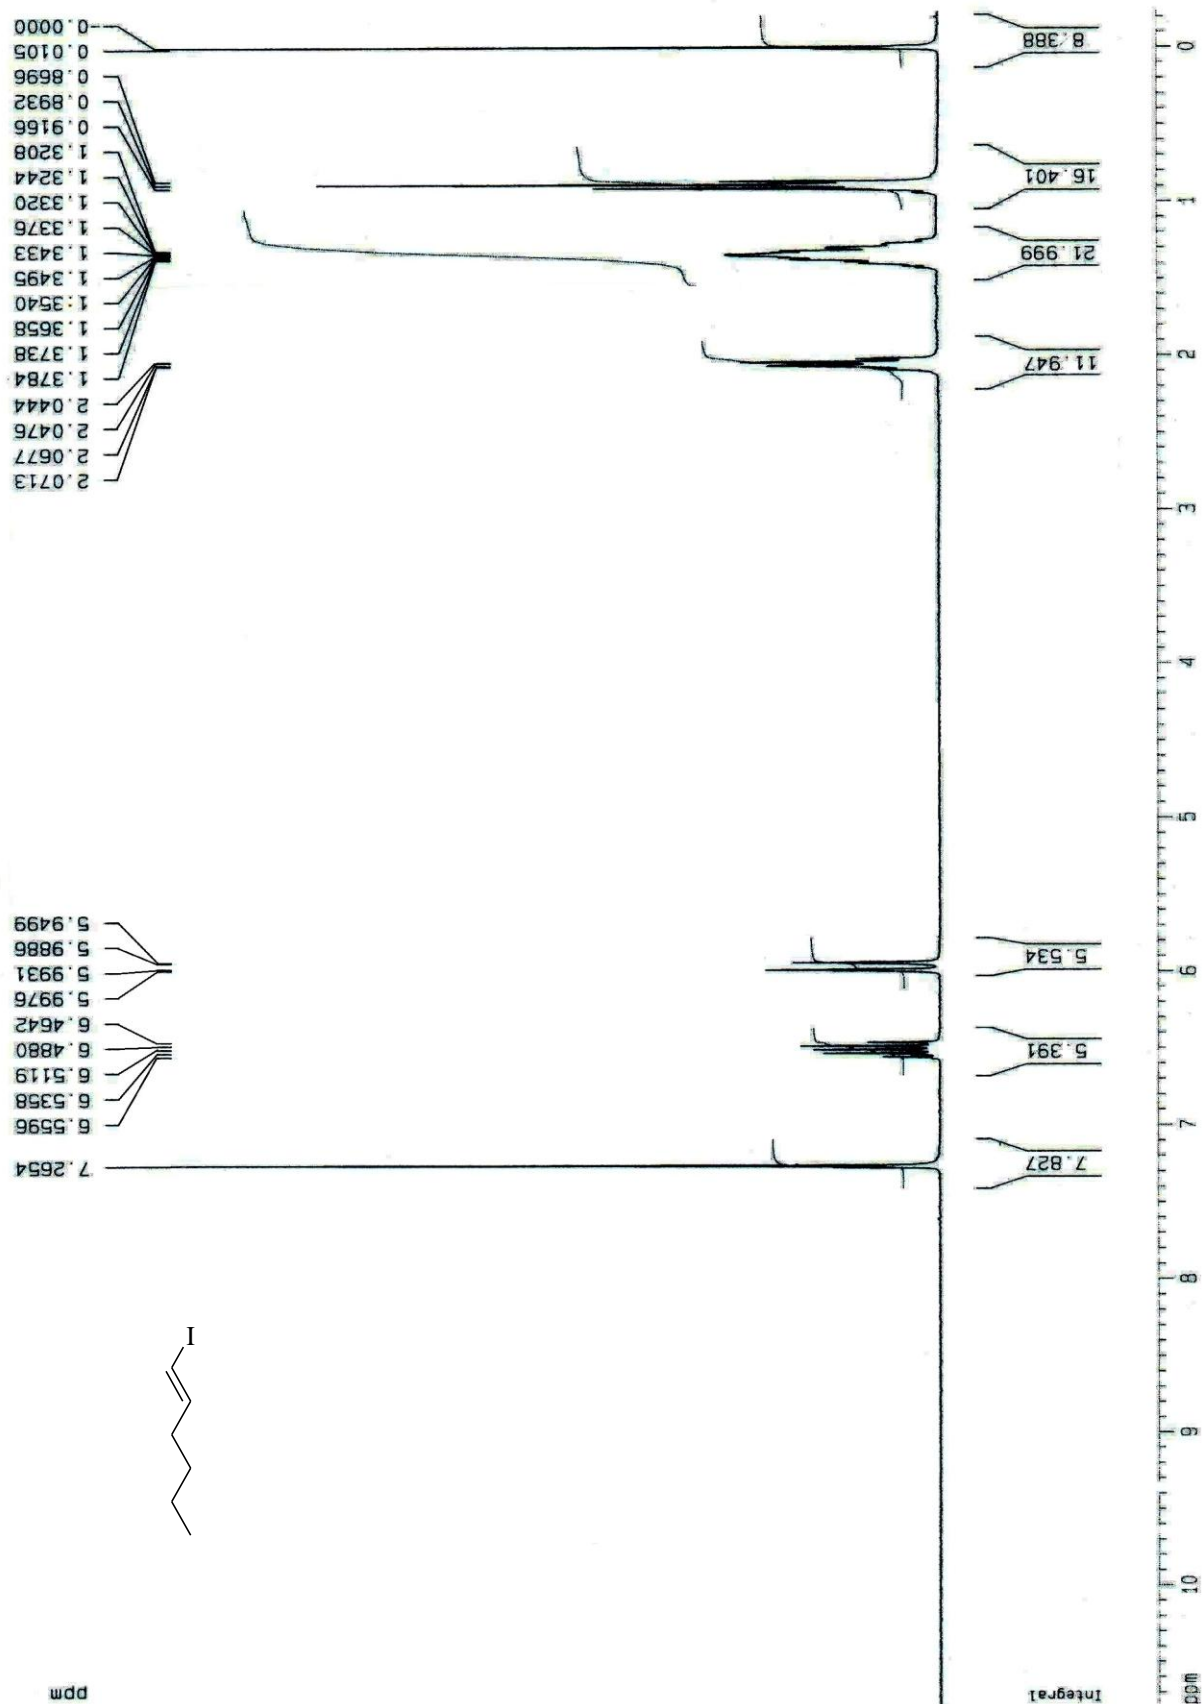

Recorded by: Dr. P.J. Saikia  
Name of Sample: BS-Trans-Iodo  
Spectrum No.: 5401

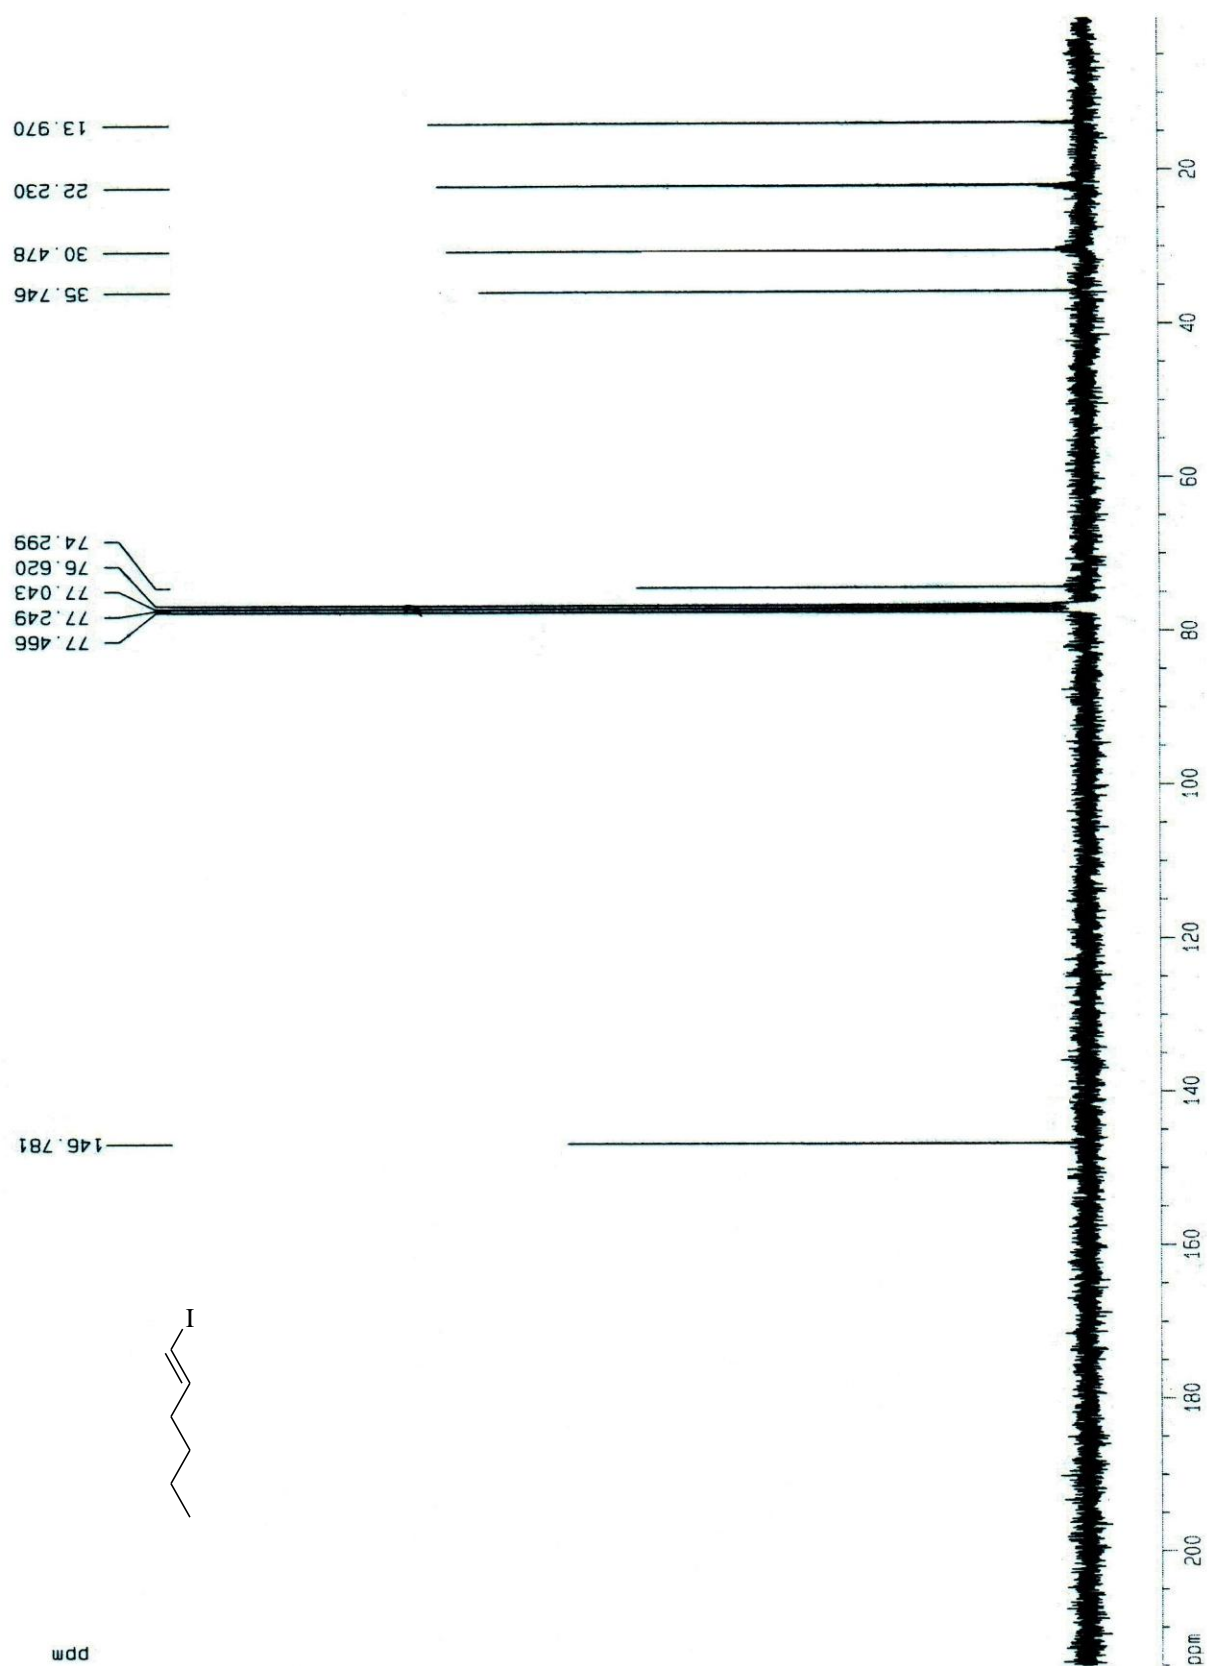

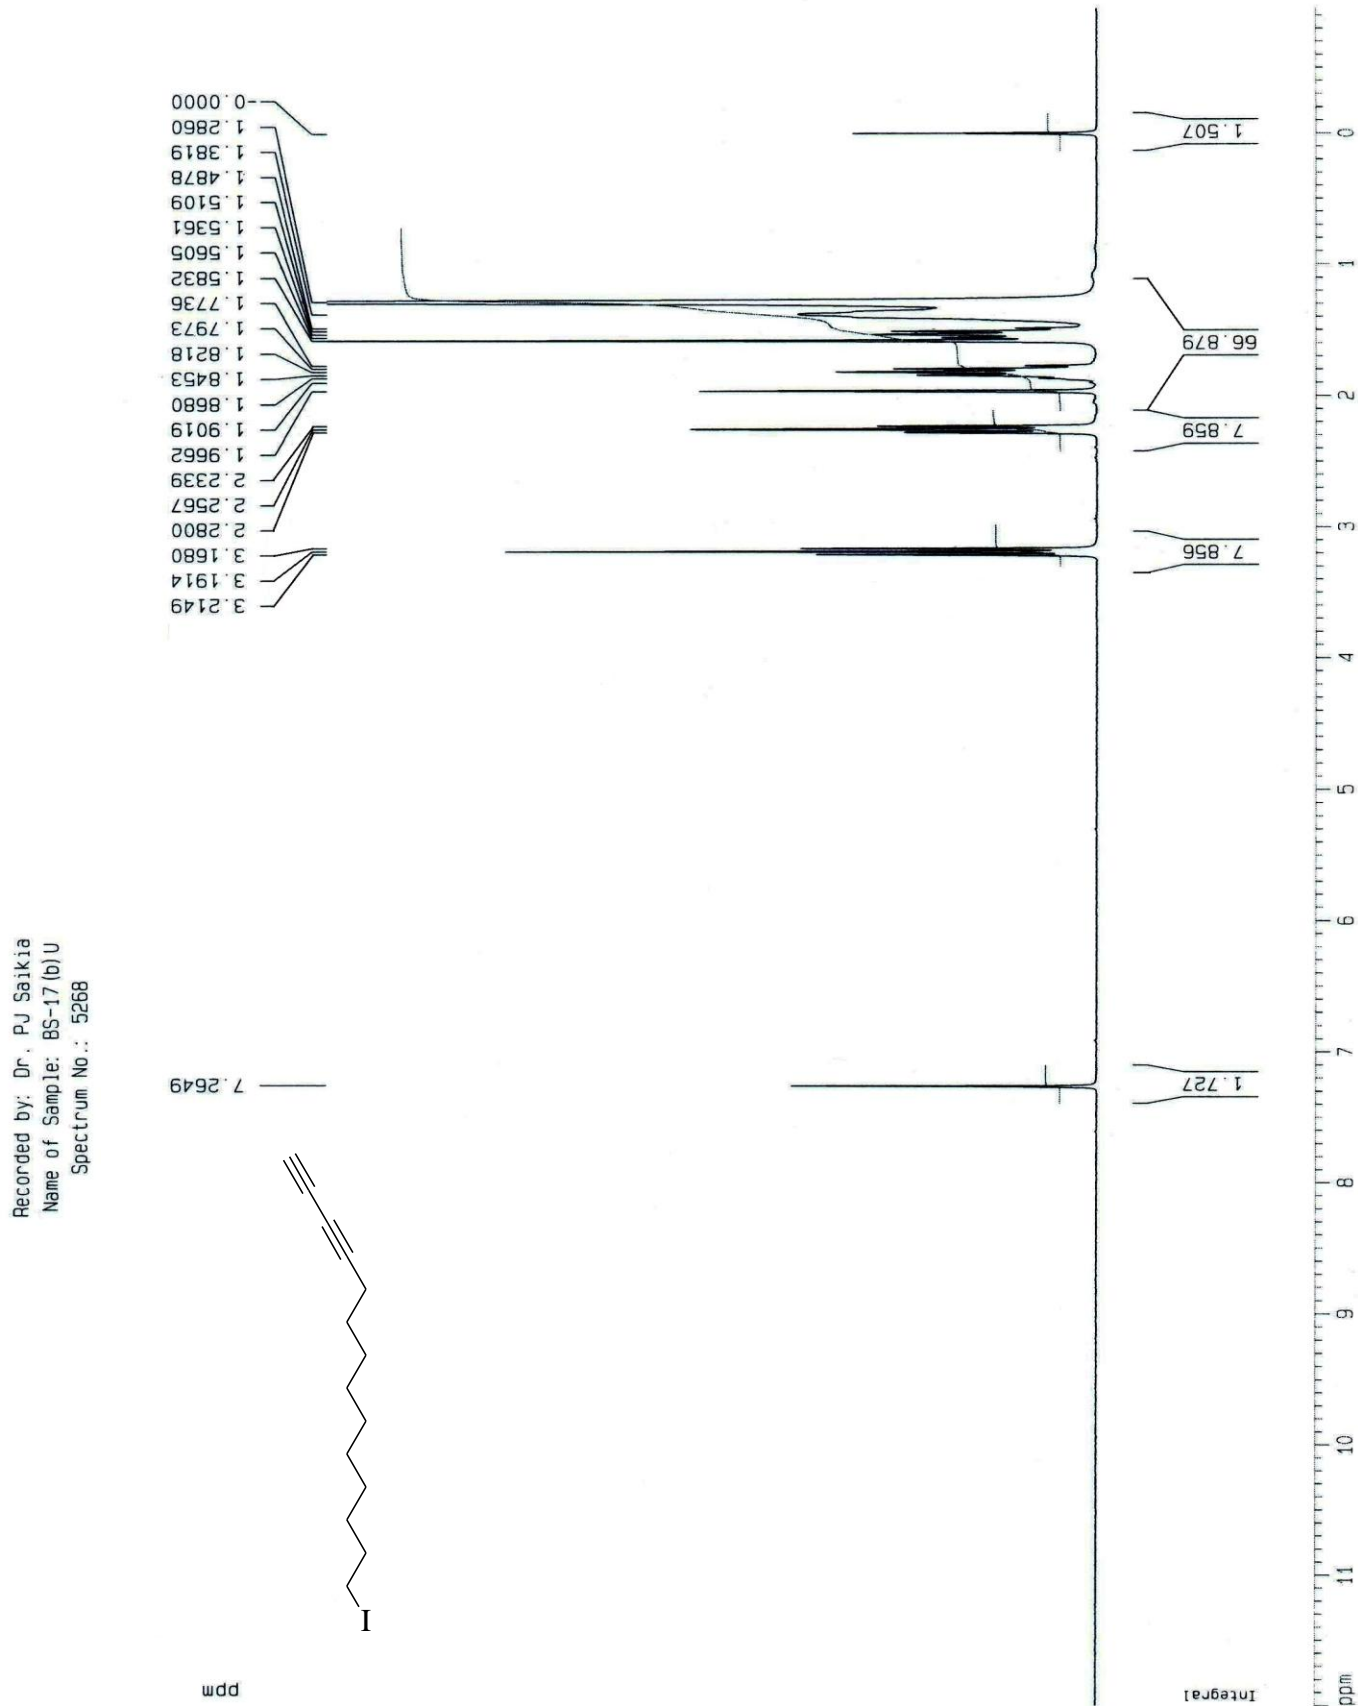

Recorded by: Dr. P.J. Saikia  
Name of Sample: BS-17b (U)  
Spectrum No : 5373

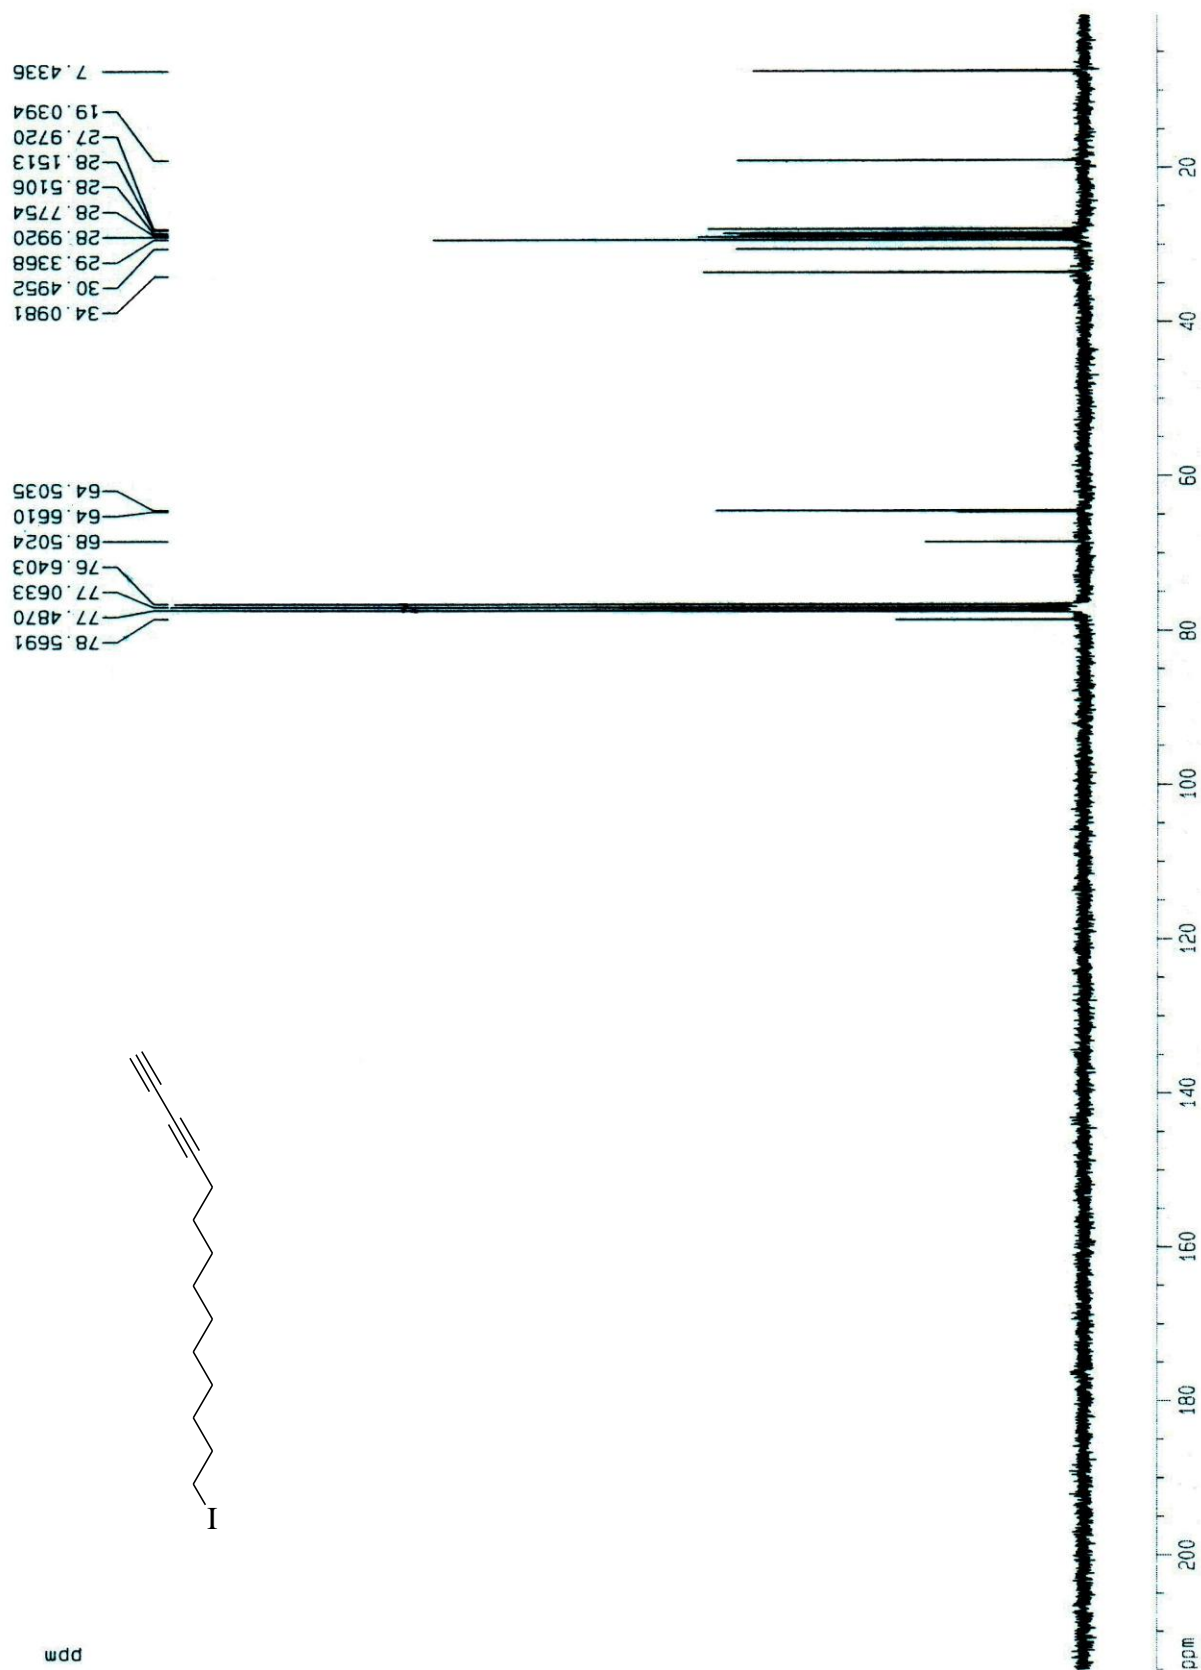

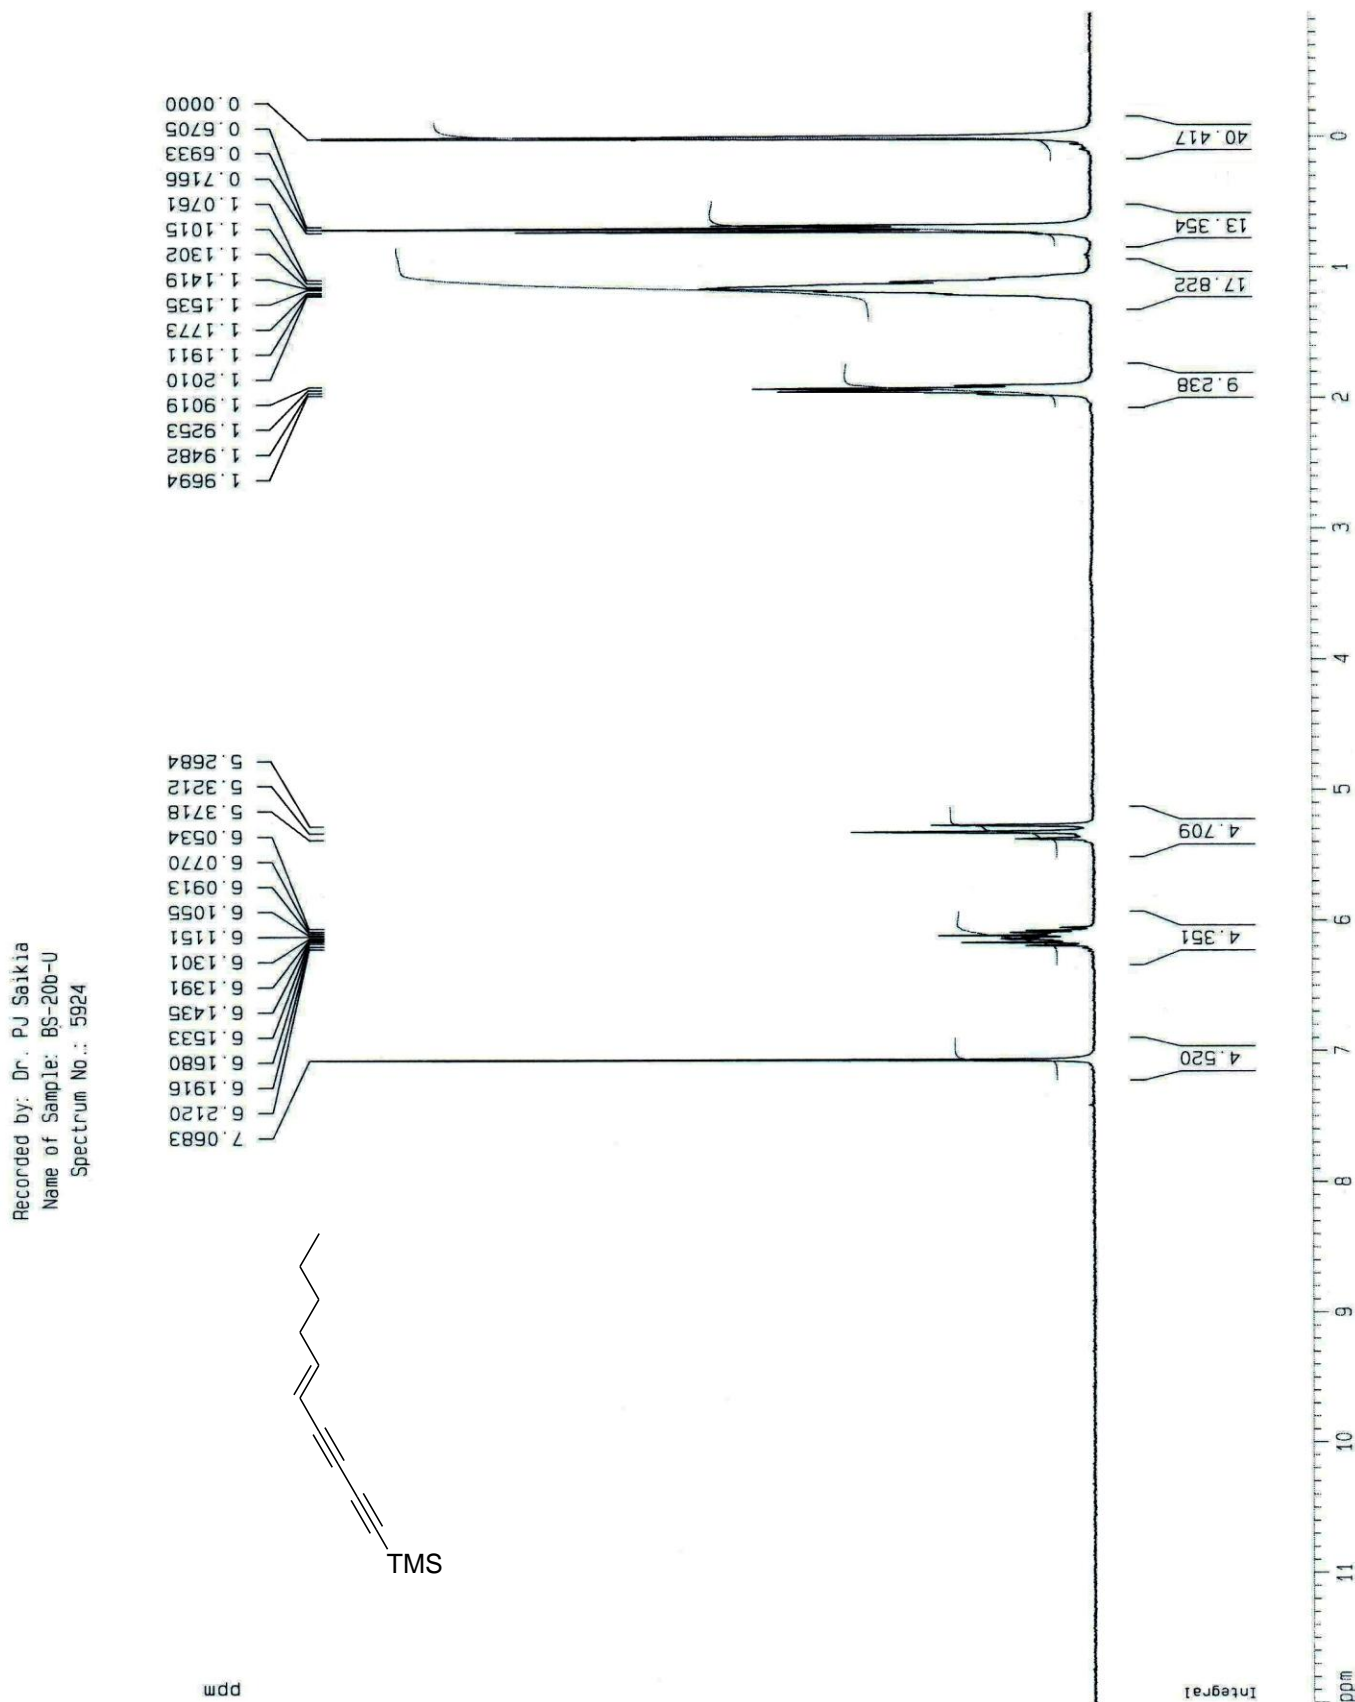

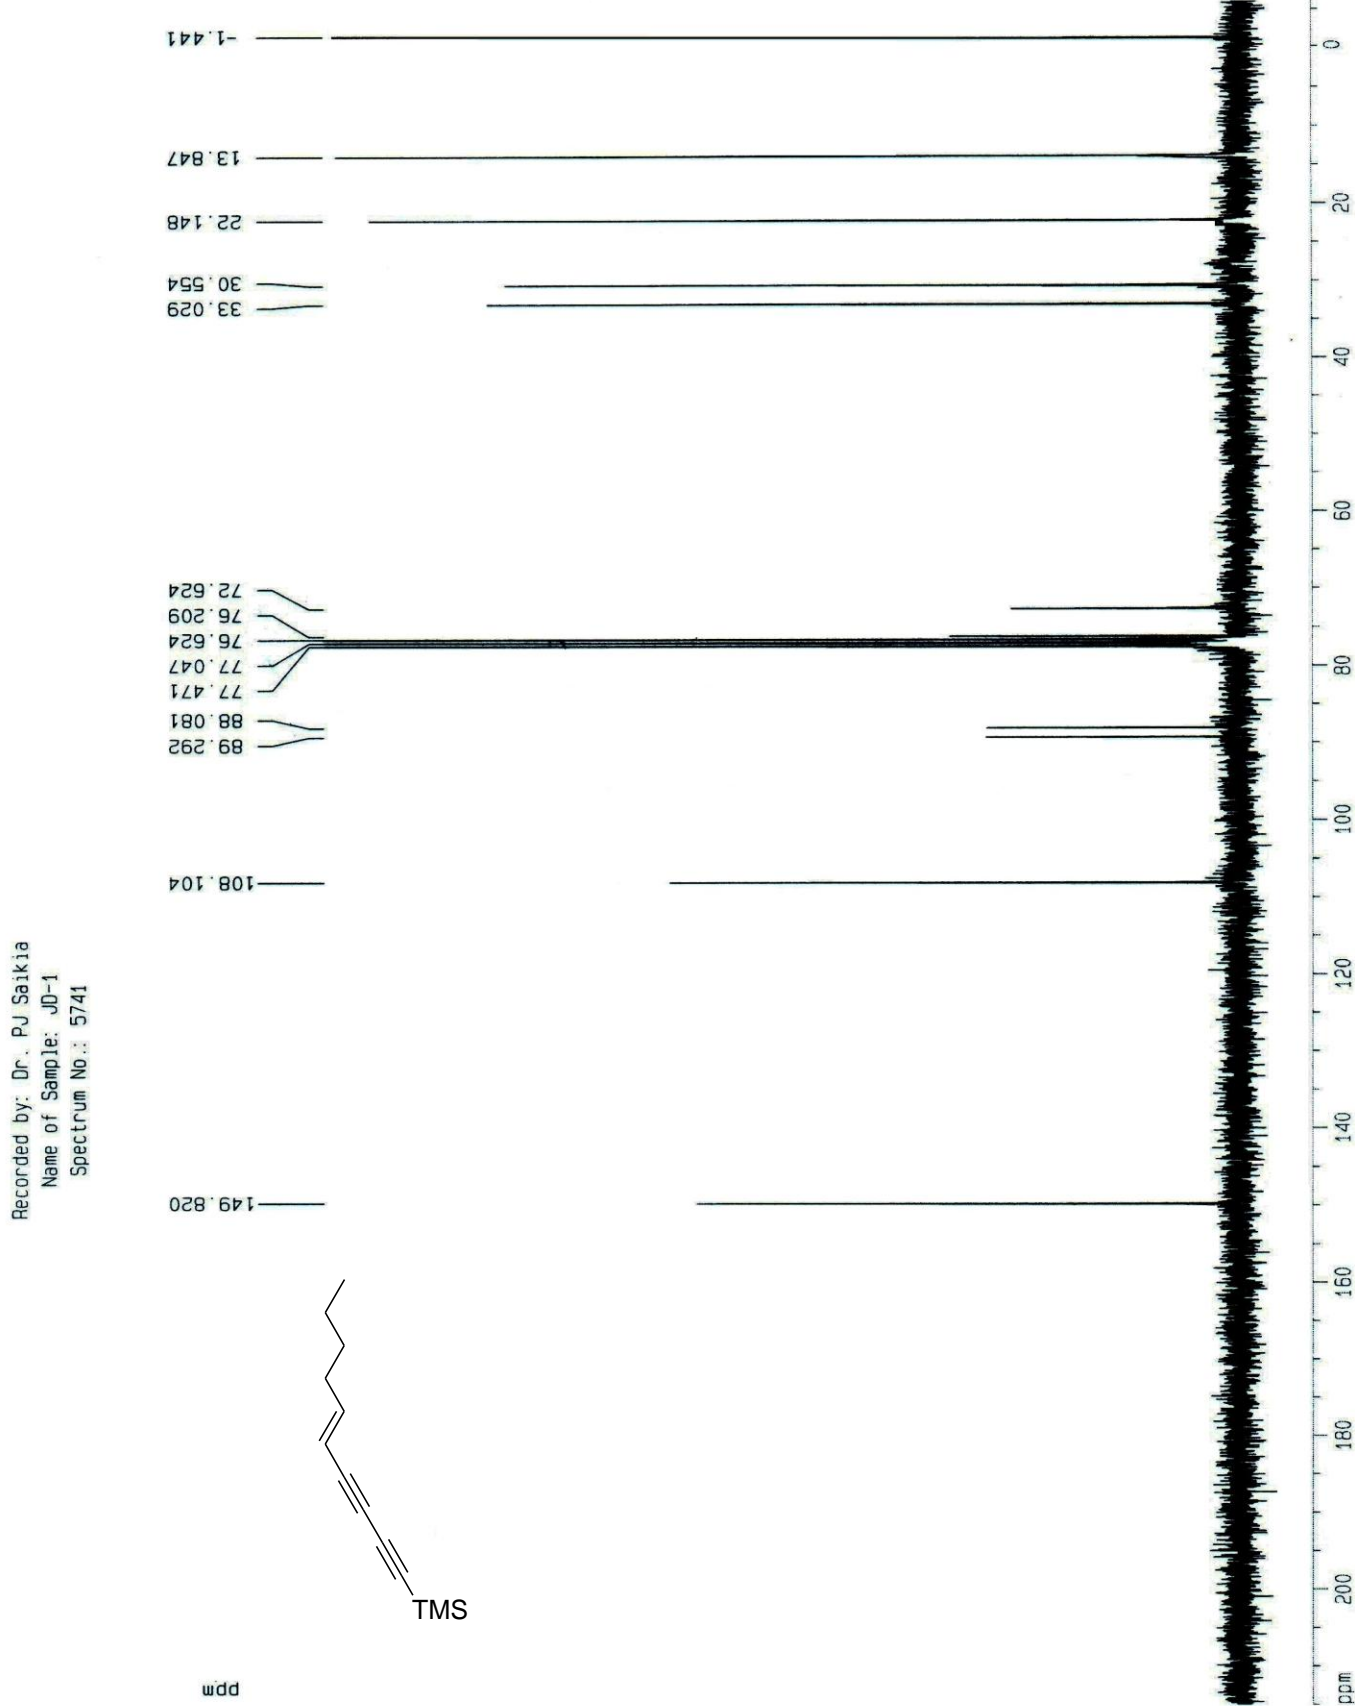



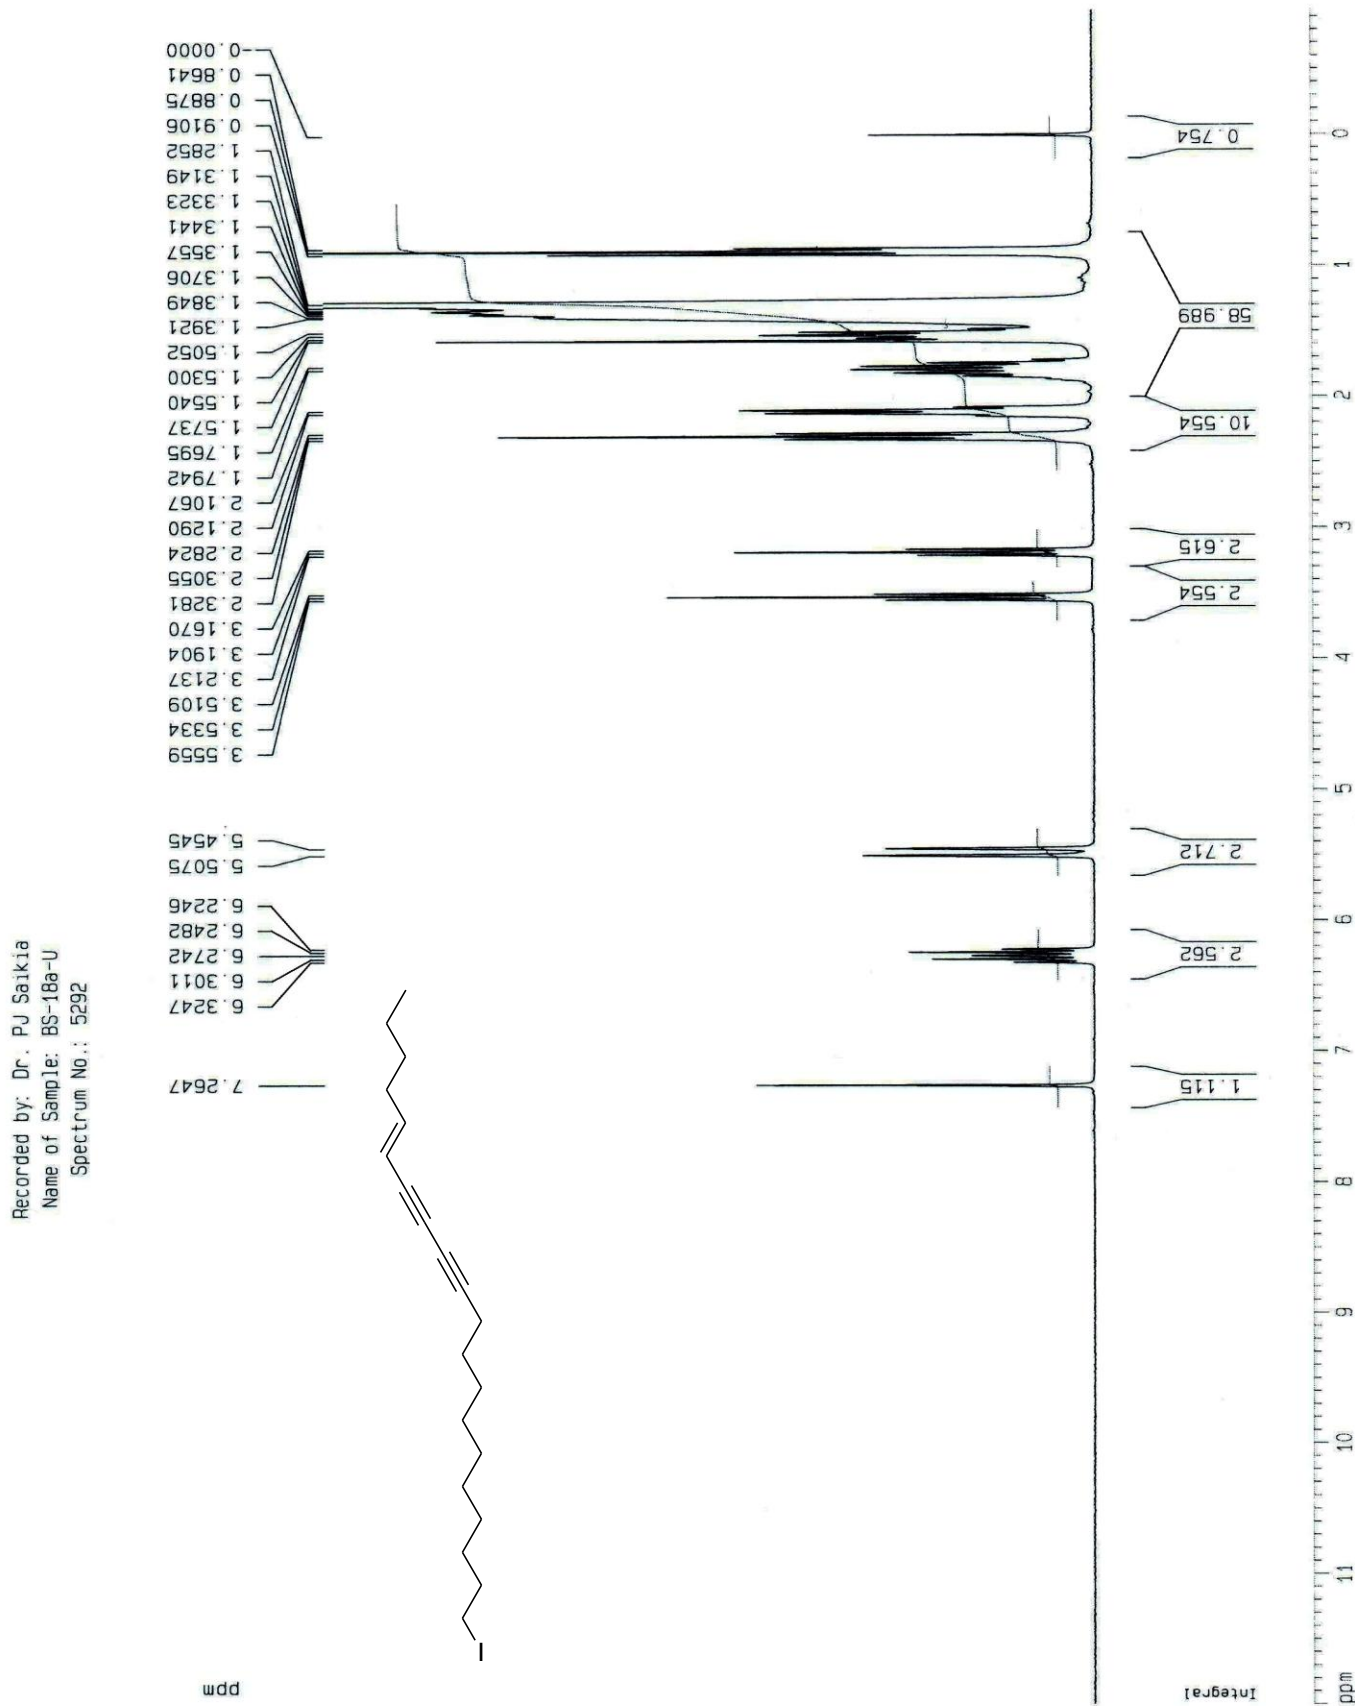



Recorded by: Dr. P.J. Saikia  
Name of Sample: BS-18aU  
Spectrum No.: 5320

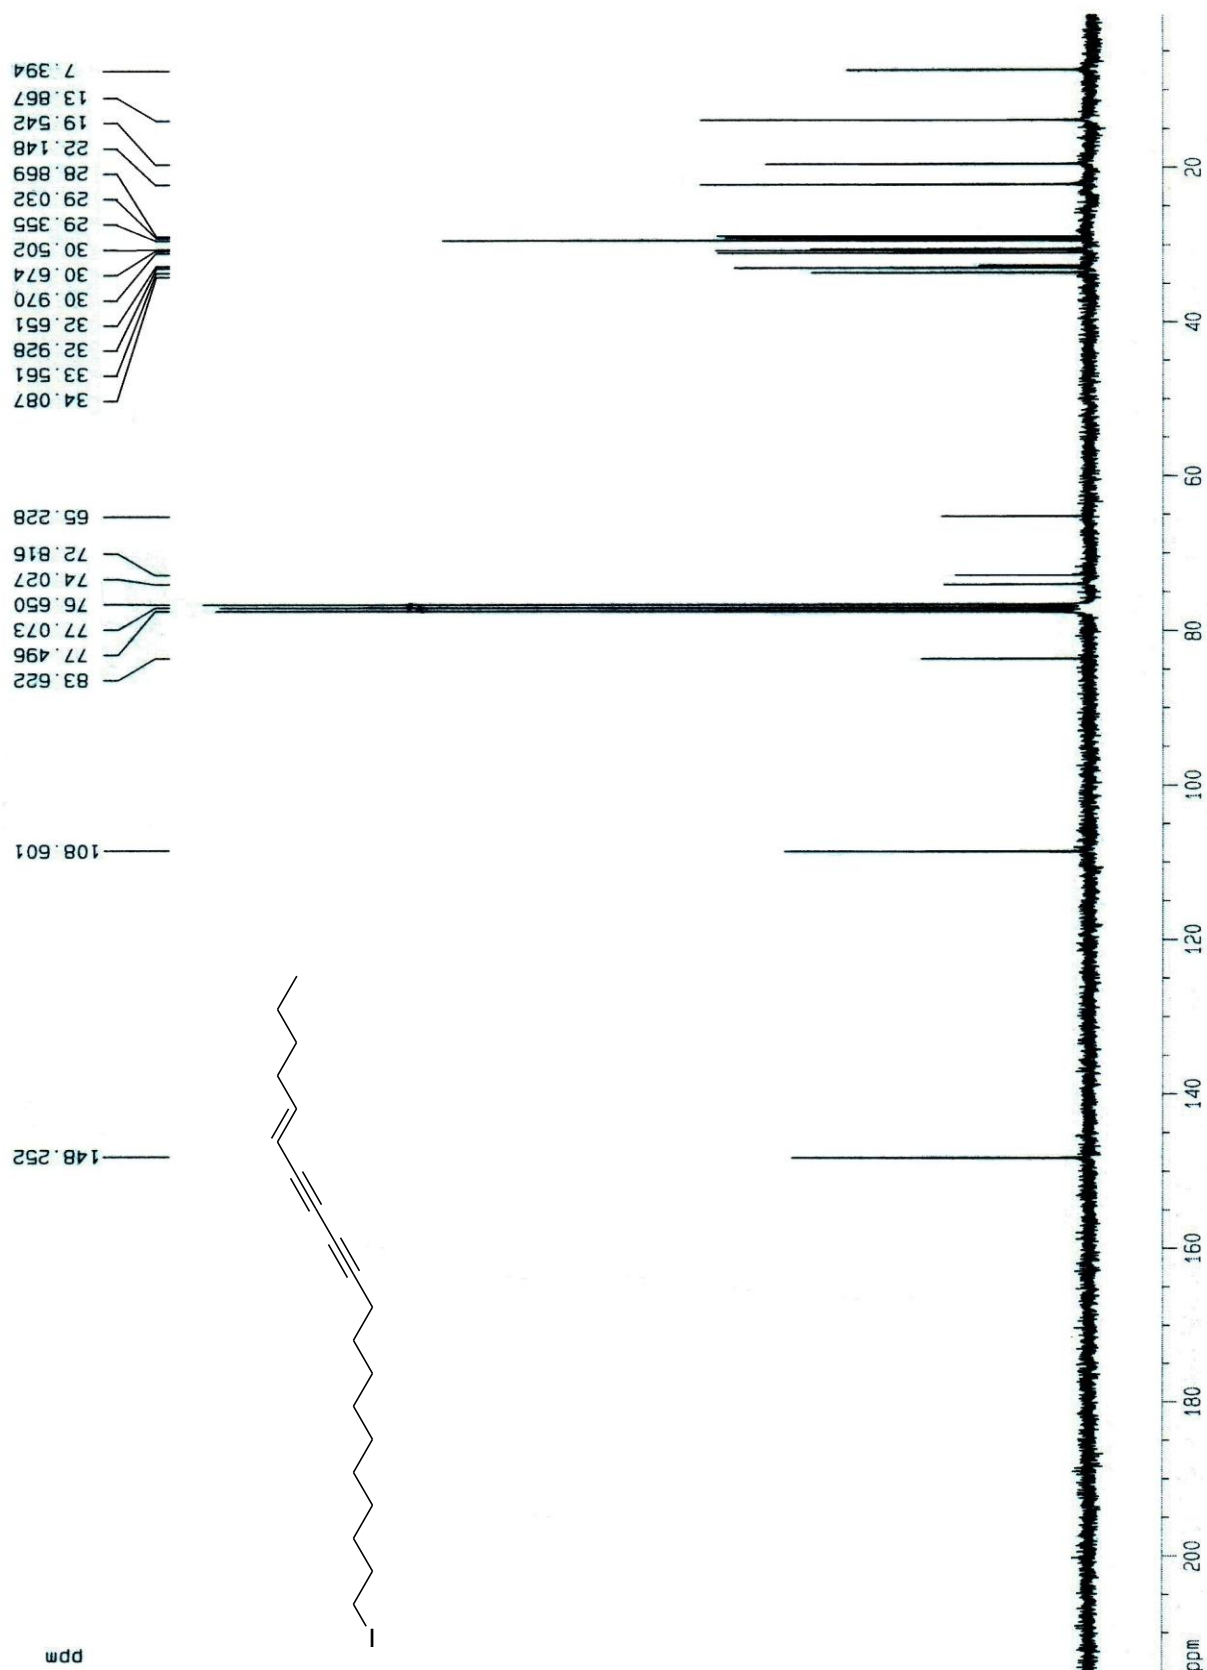

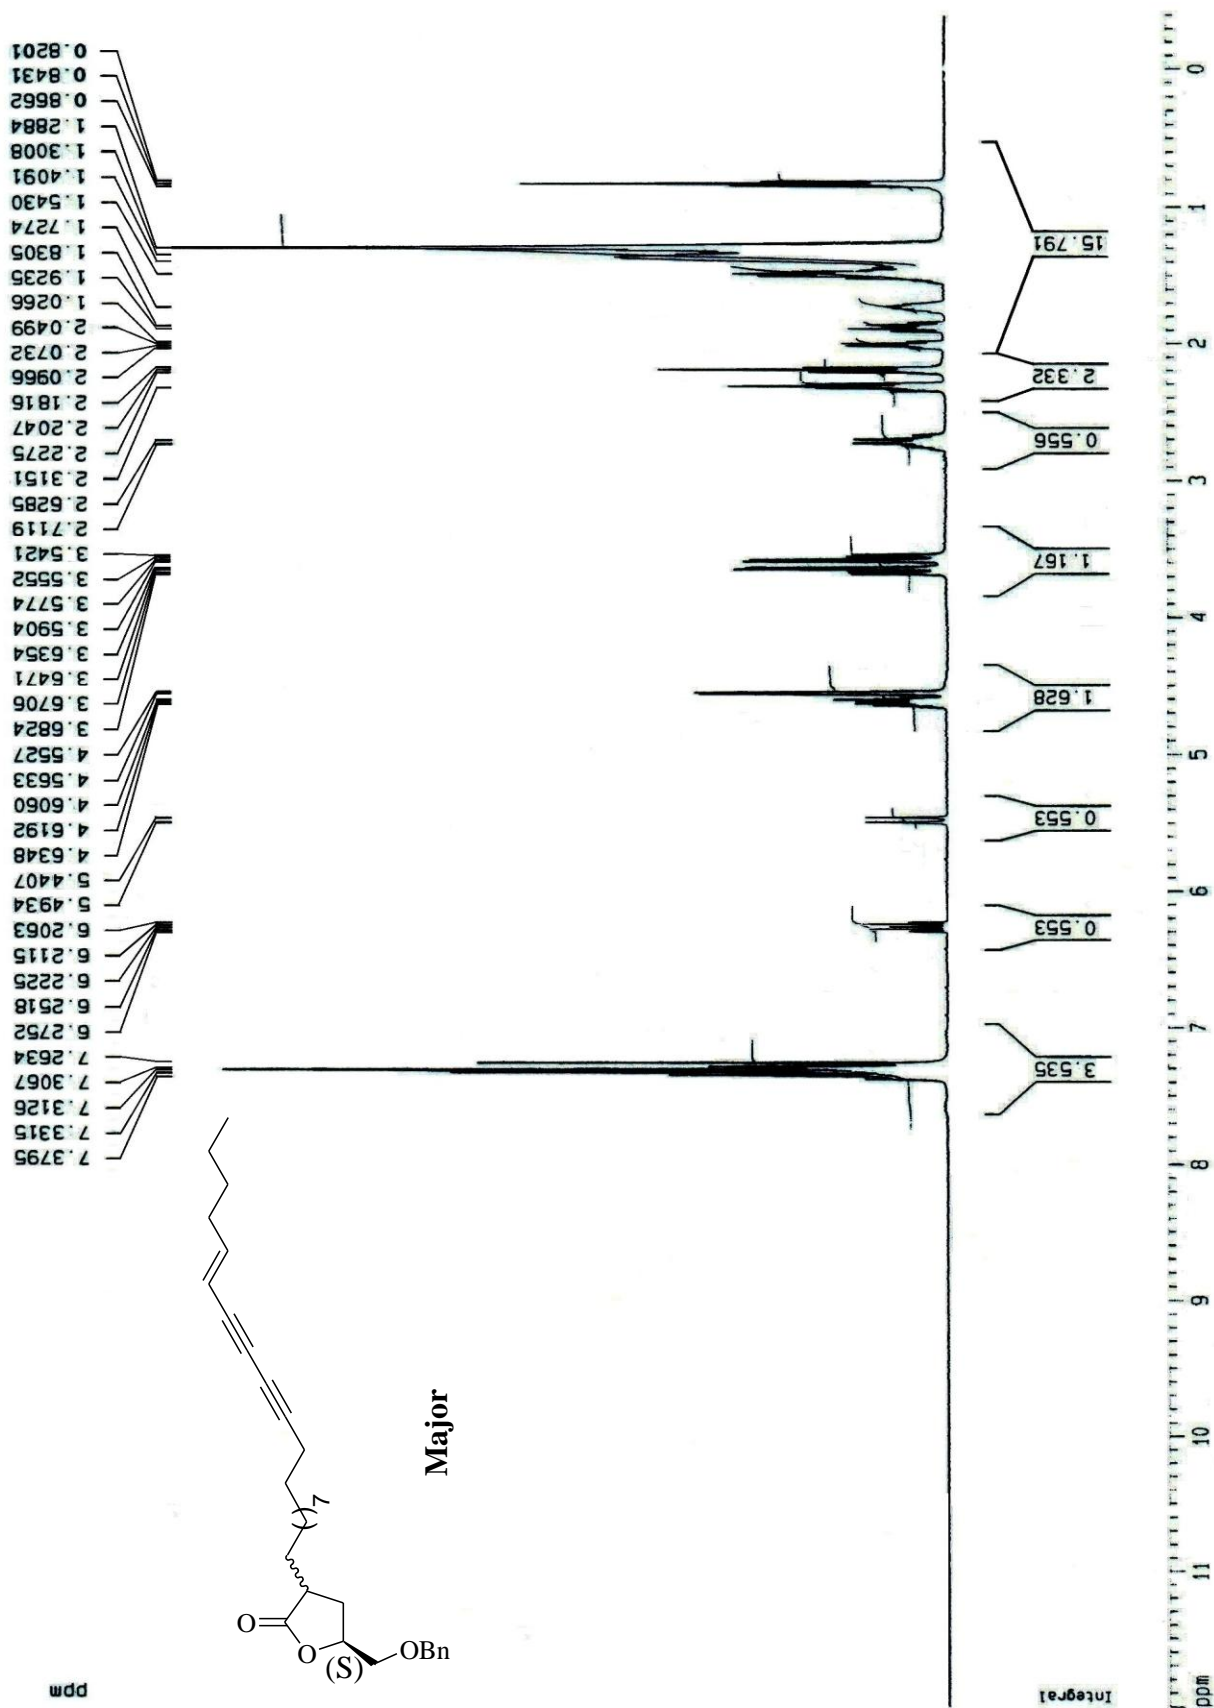

Recorded by: Dr. P.J. Saikia  
Name of Sample: BS-1  
Spectrum No.: 6411

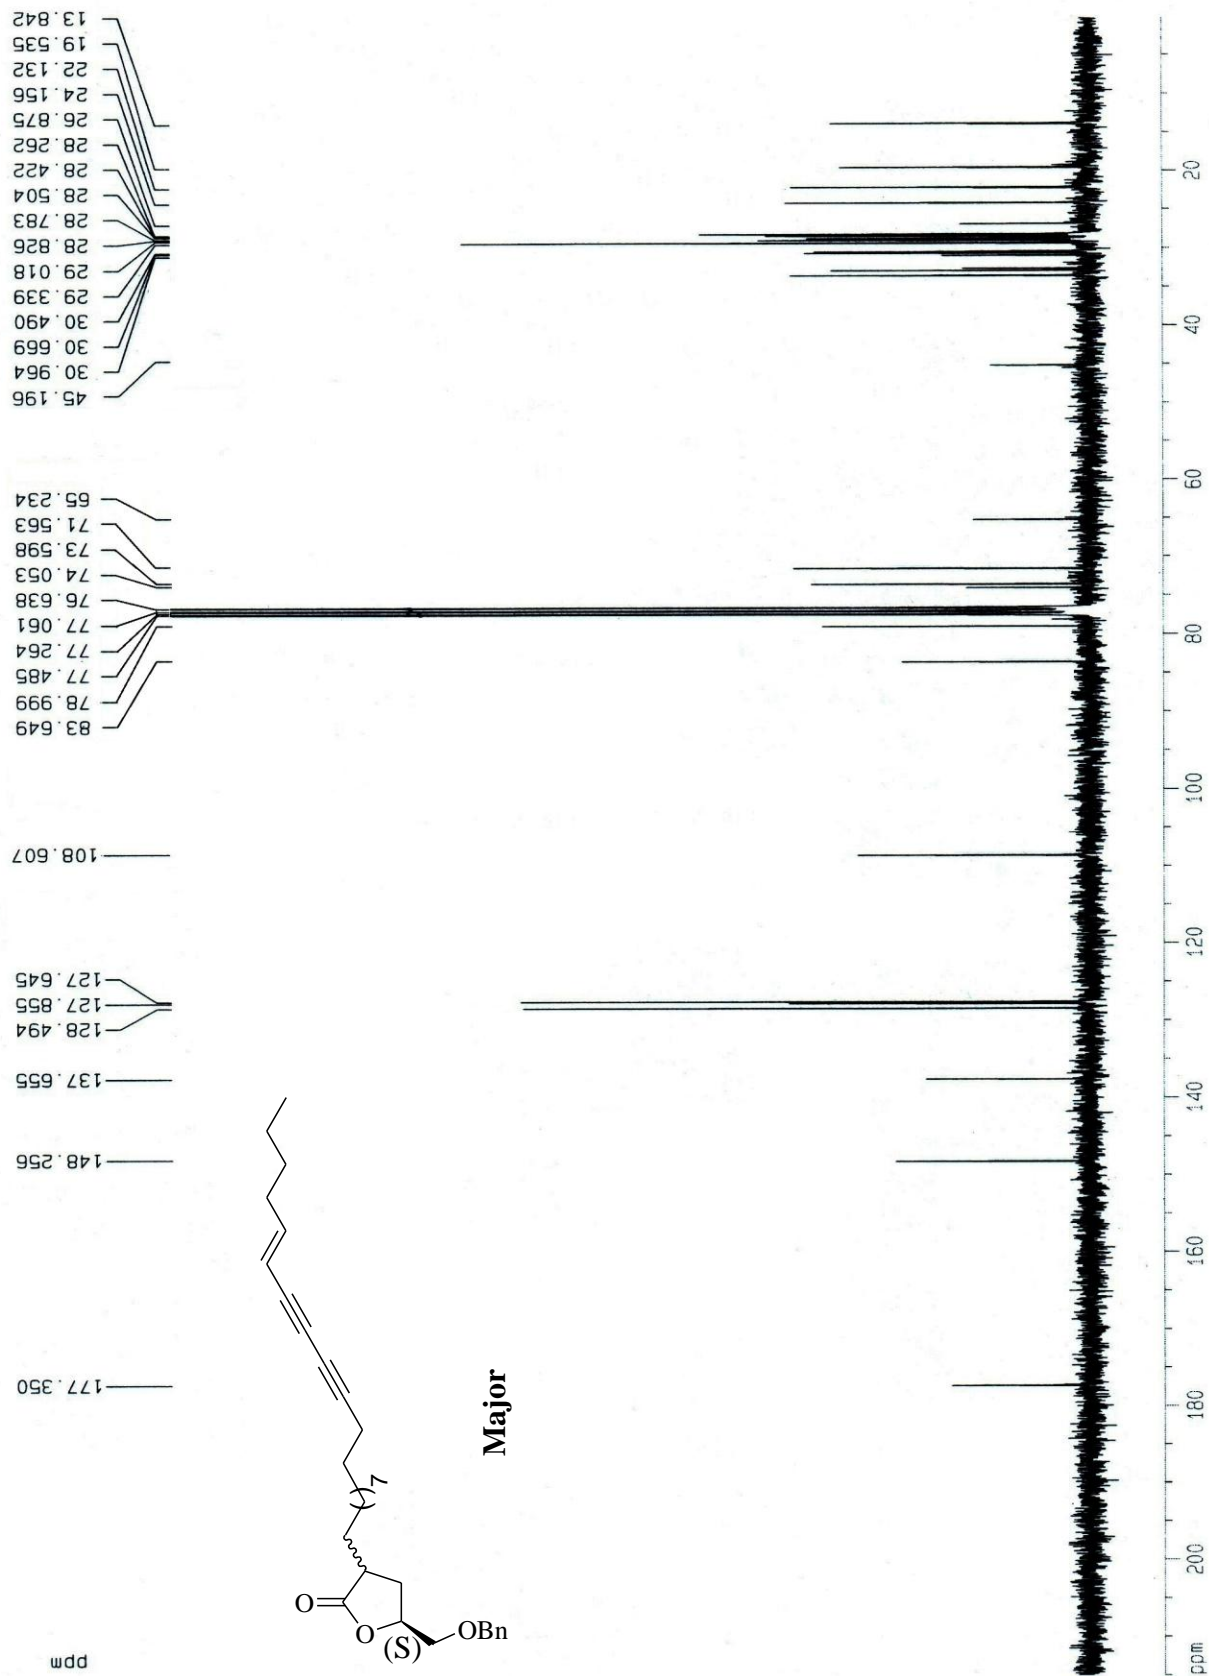

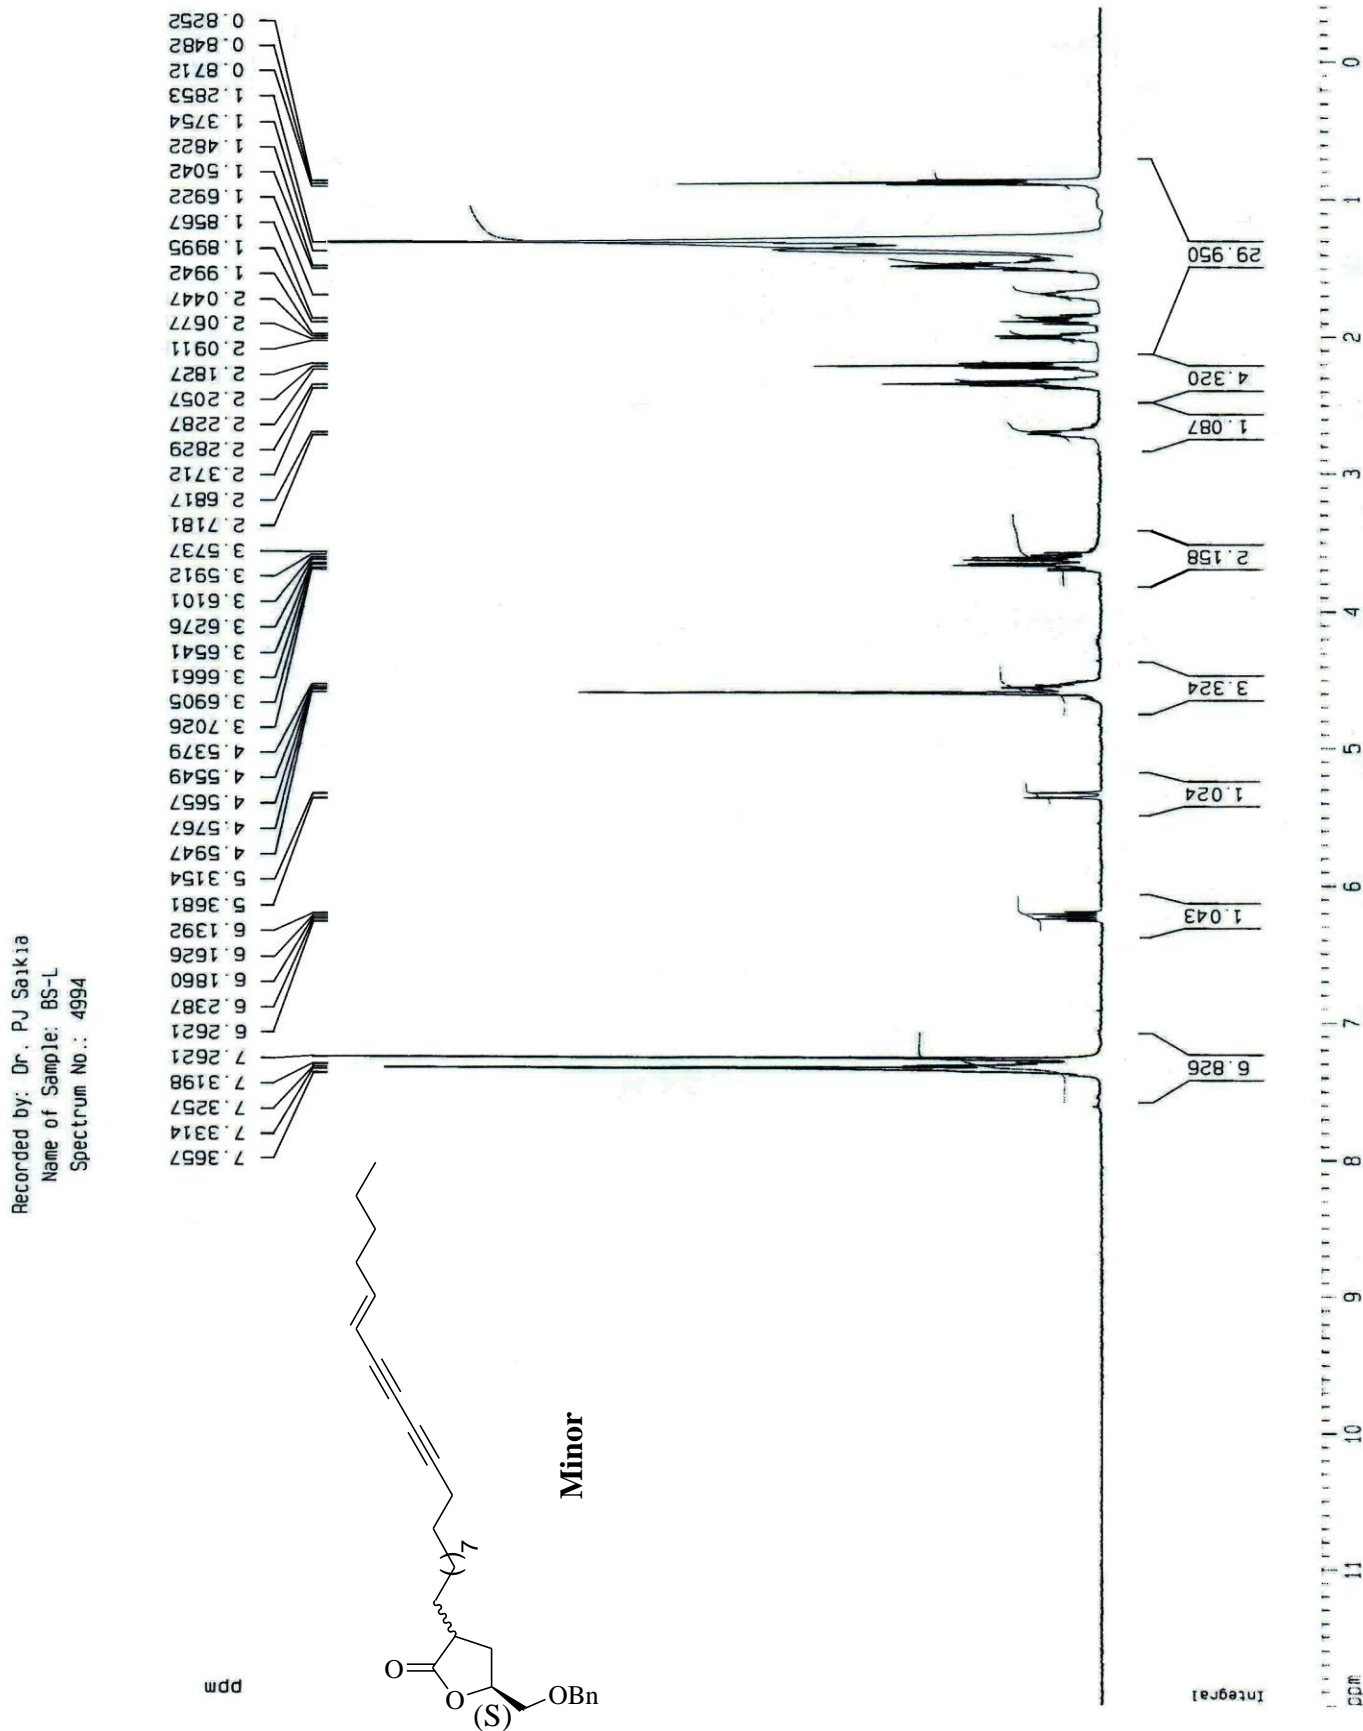

Recorded by: Dr. P.J. Saikia  
Name of Sample: BS-1b  
Spectrum No.: 6412

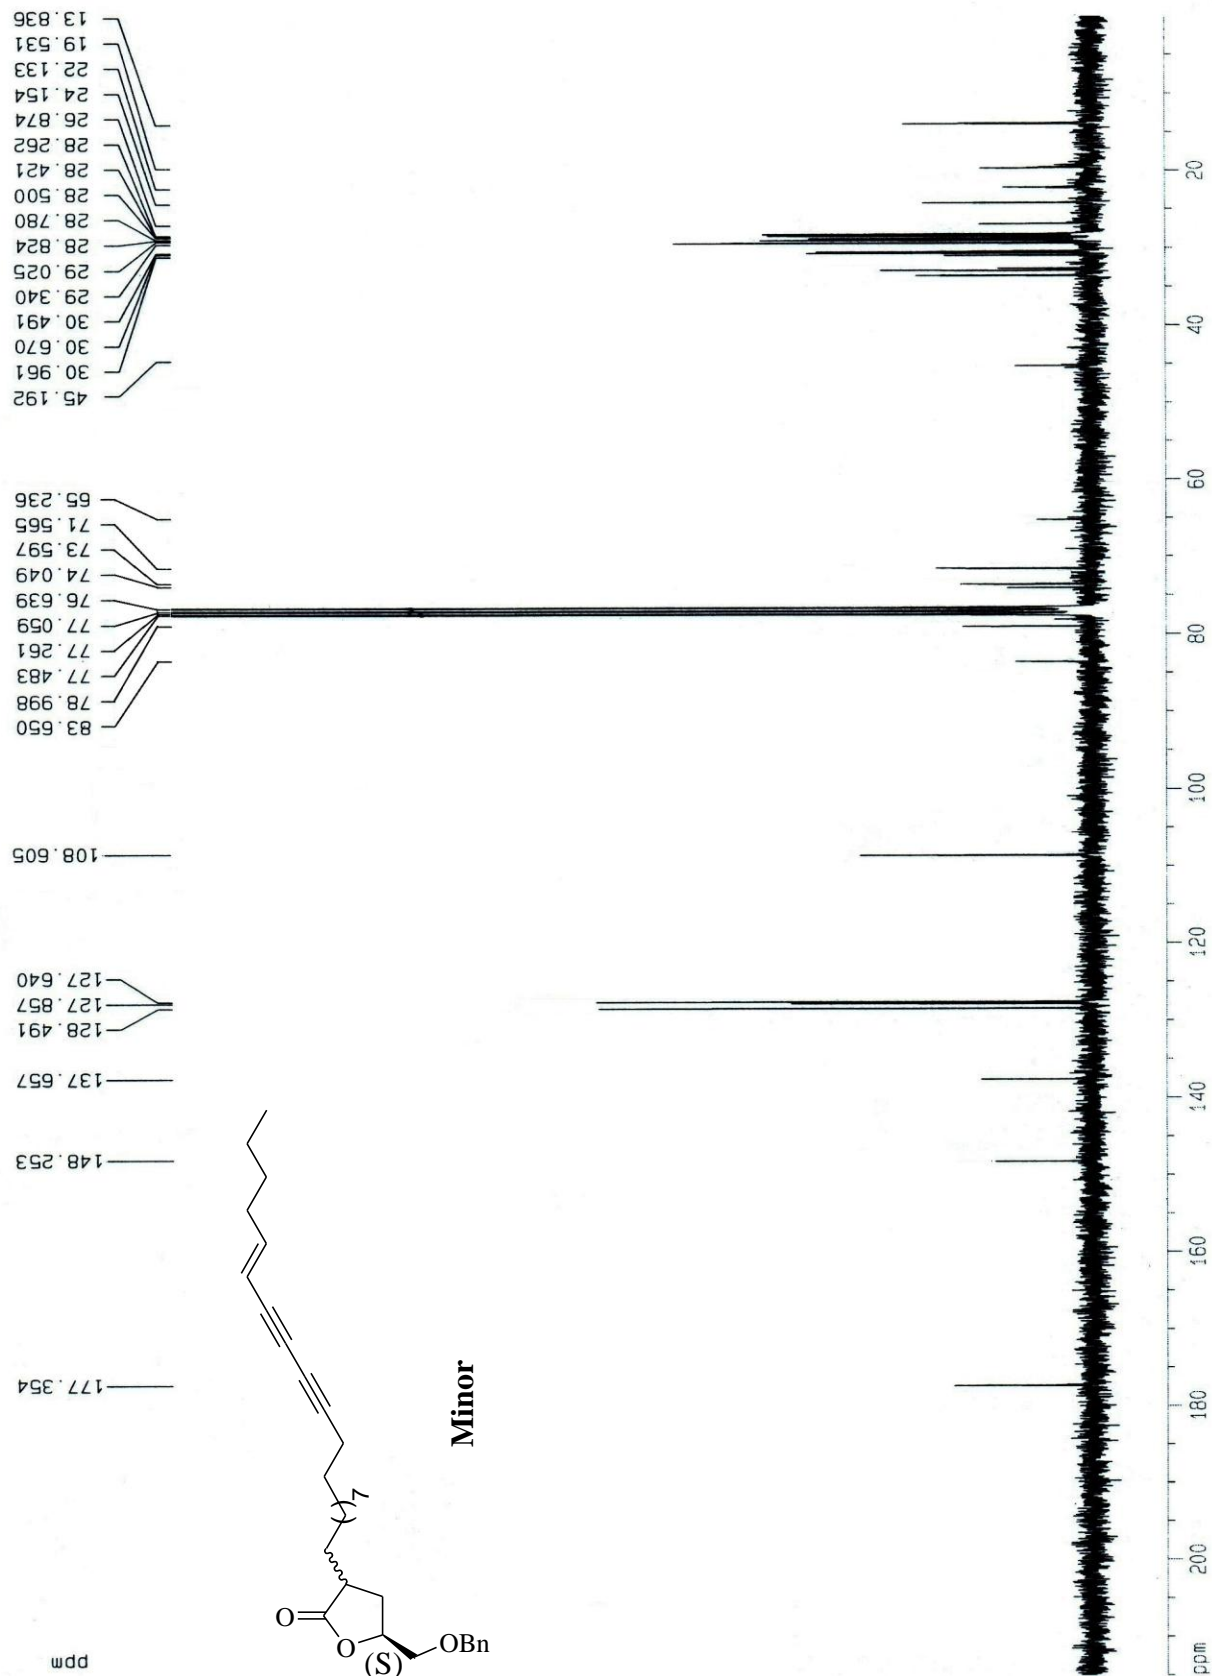



Recorded by: Dr. P.J. Saikia  
Name of Sample: BS-23a  
Spectrum No.: 6529

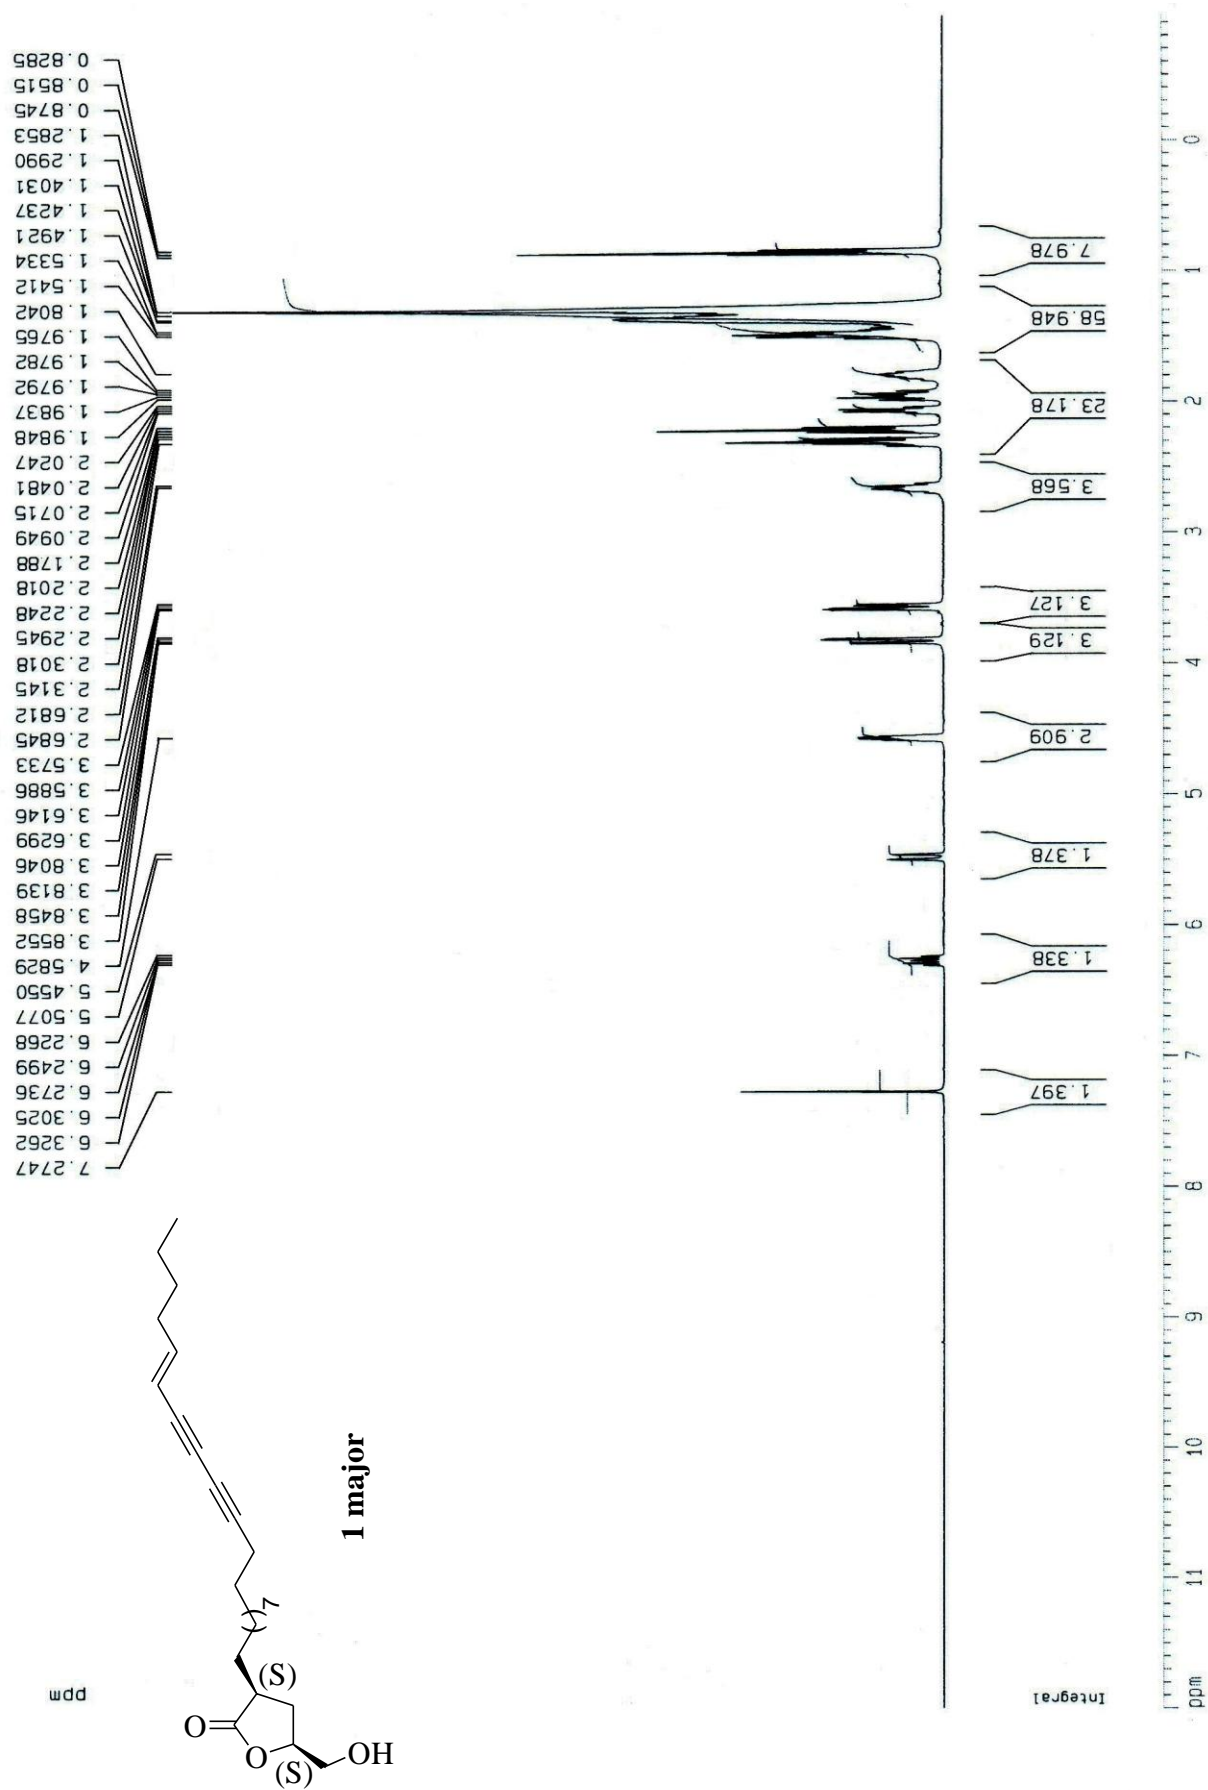

Recorded by: Dr. P.J. Saikia  
Name of Sample: BS-2  
Spectrum No.: 6599

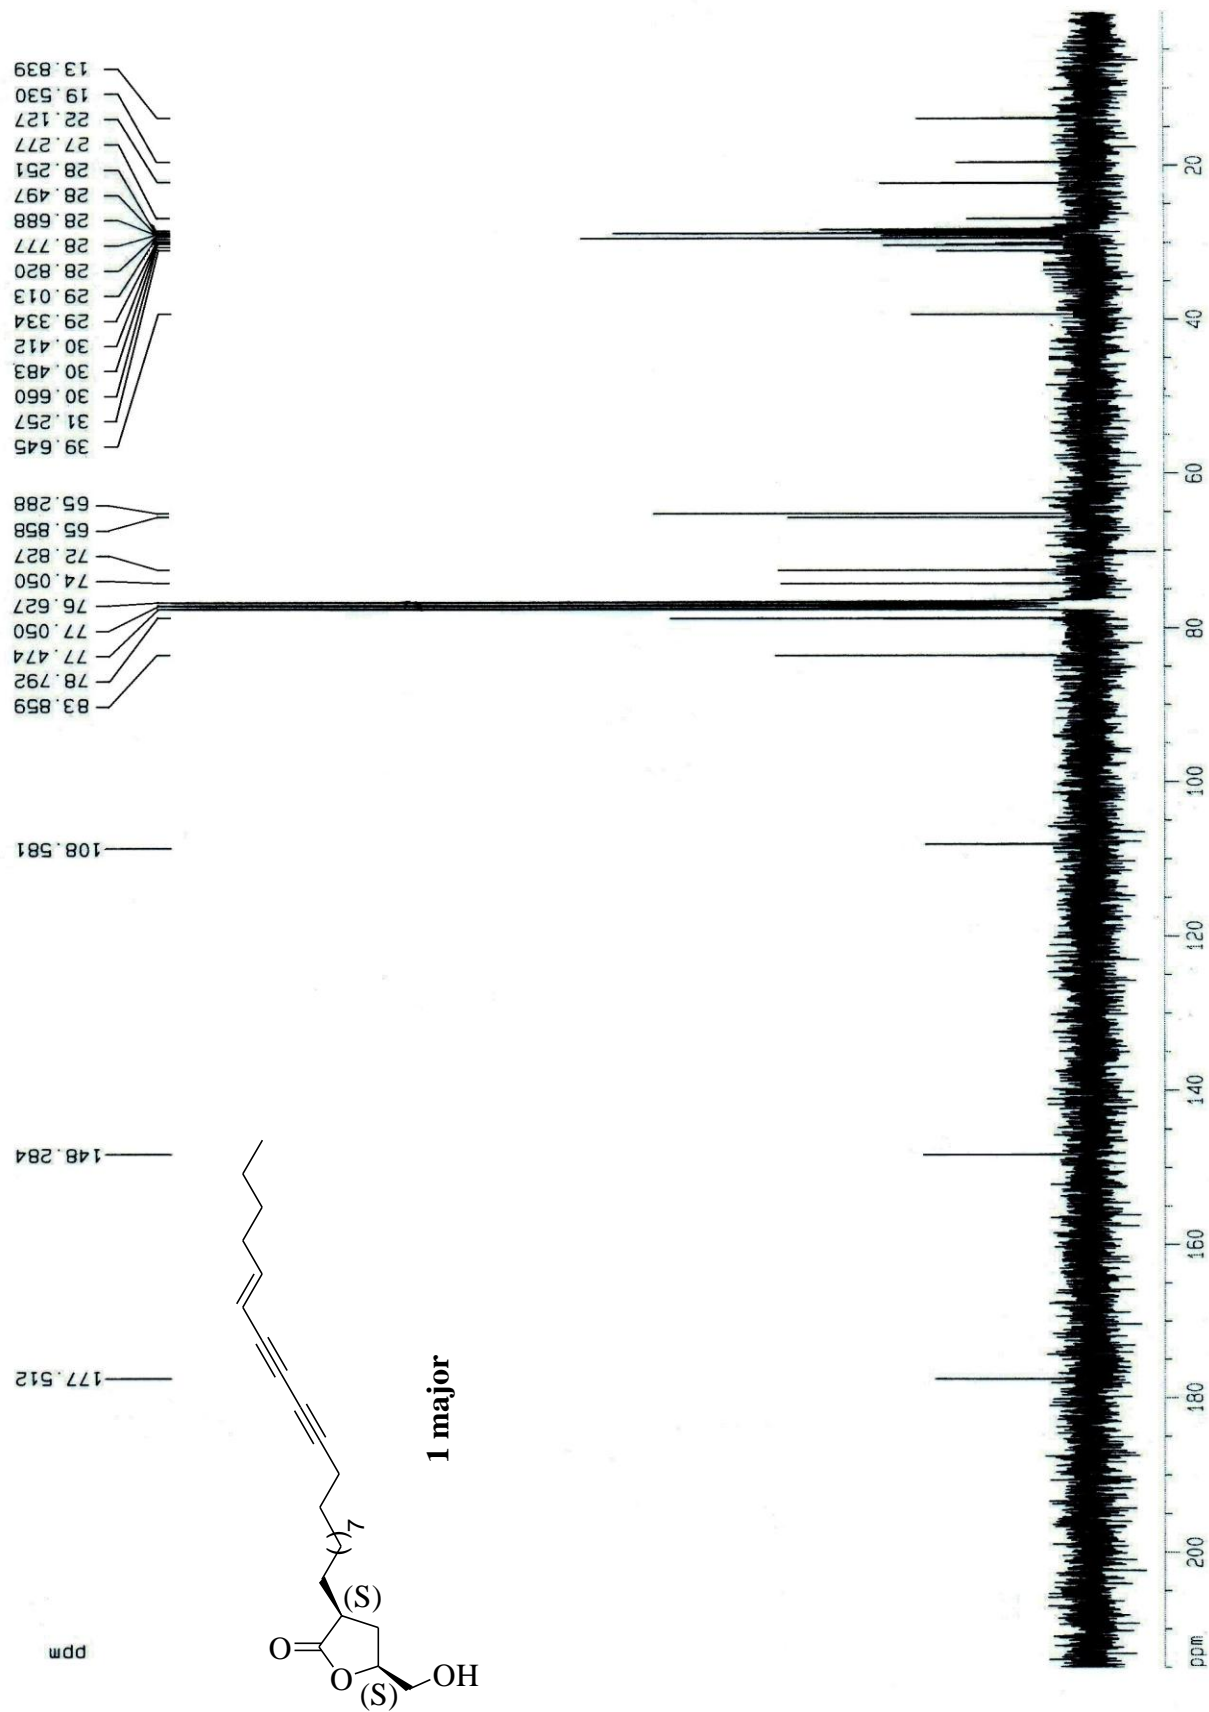



Recorded by: Dr. P.J. Saikia  
Name of Sample: BS-23a  
Spectrum No.: 6529

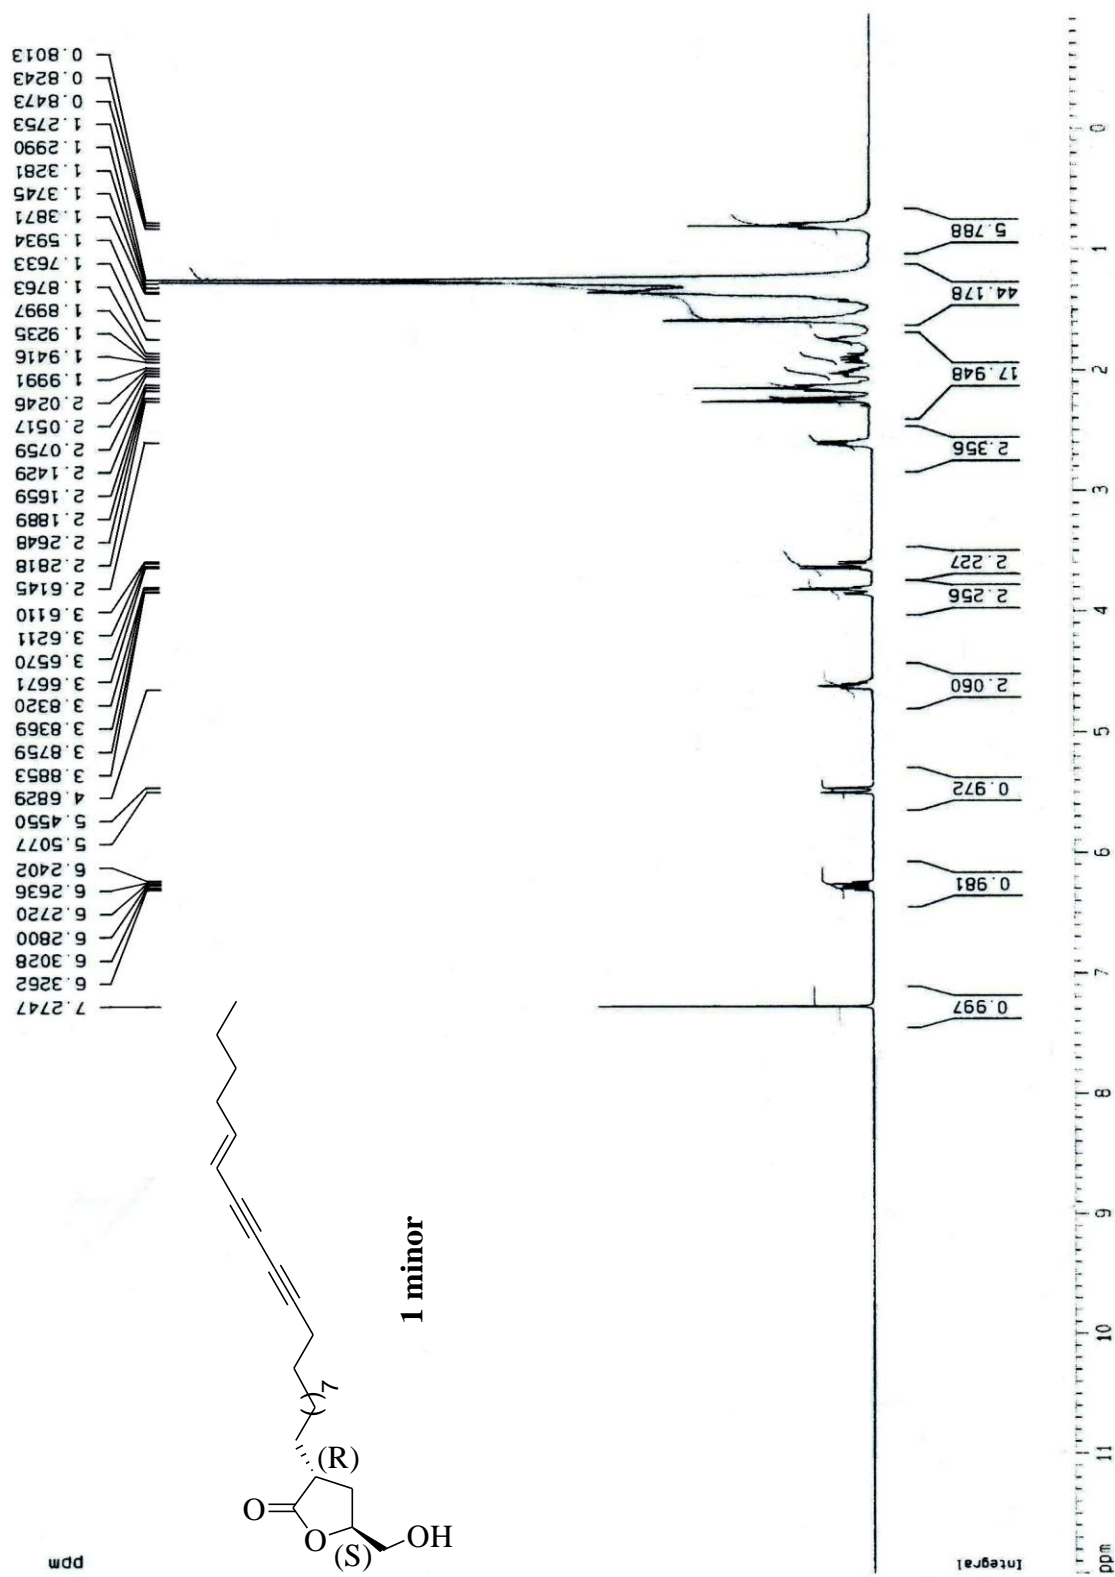

Recorded by: Dr. P.J. Saikia  
Name of Sample: BS-2a  
Spectrum No.: 6600

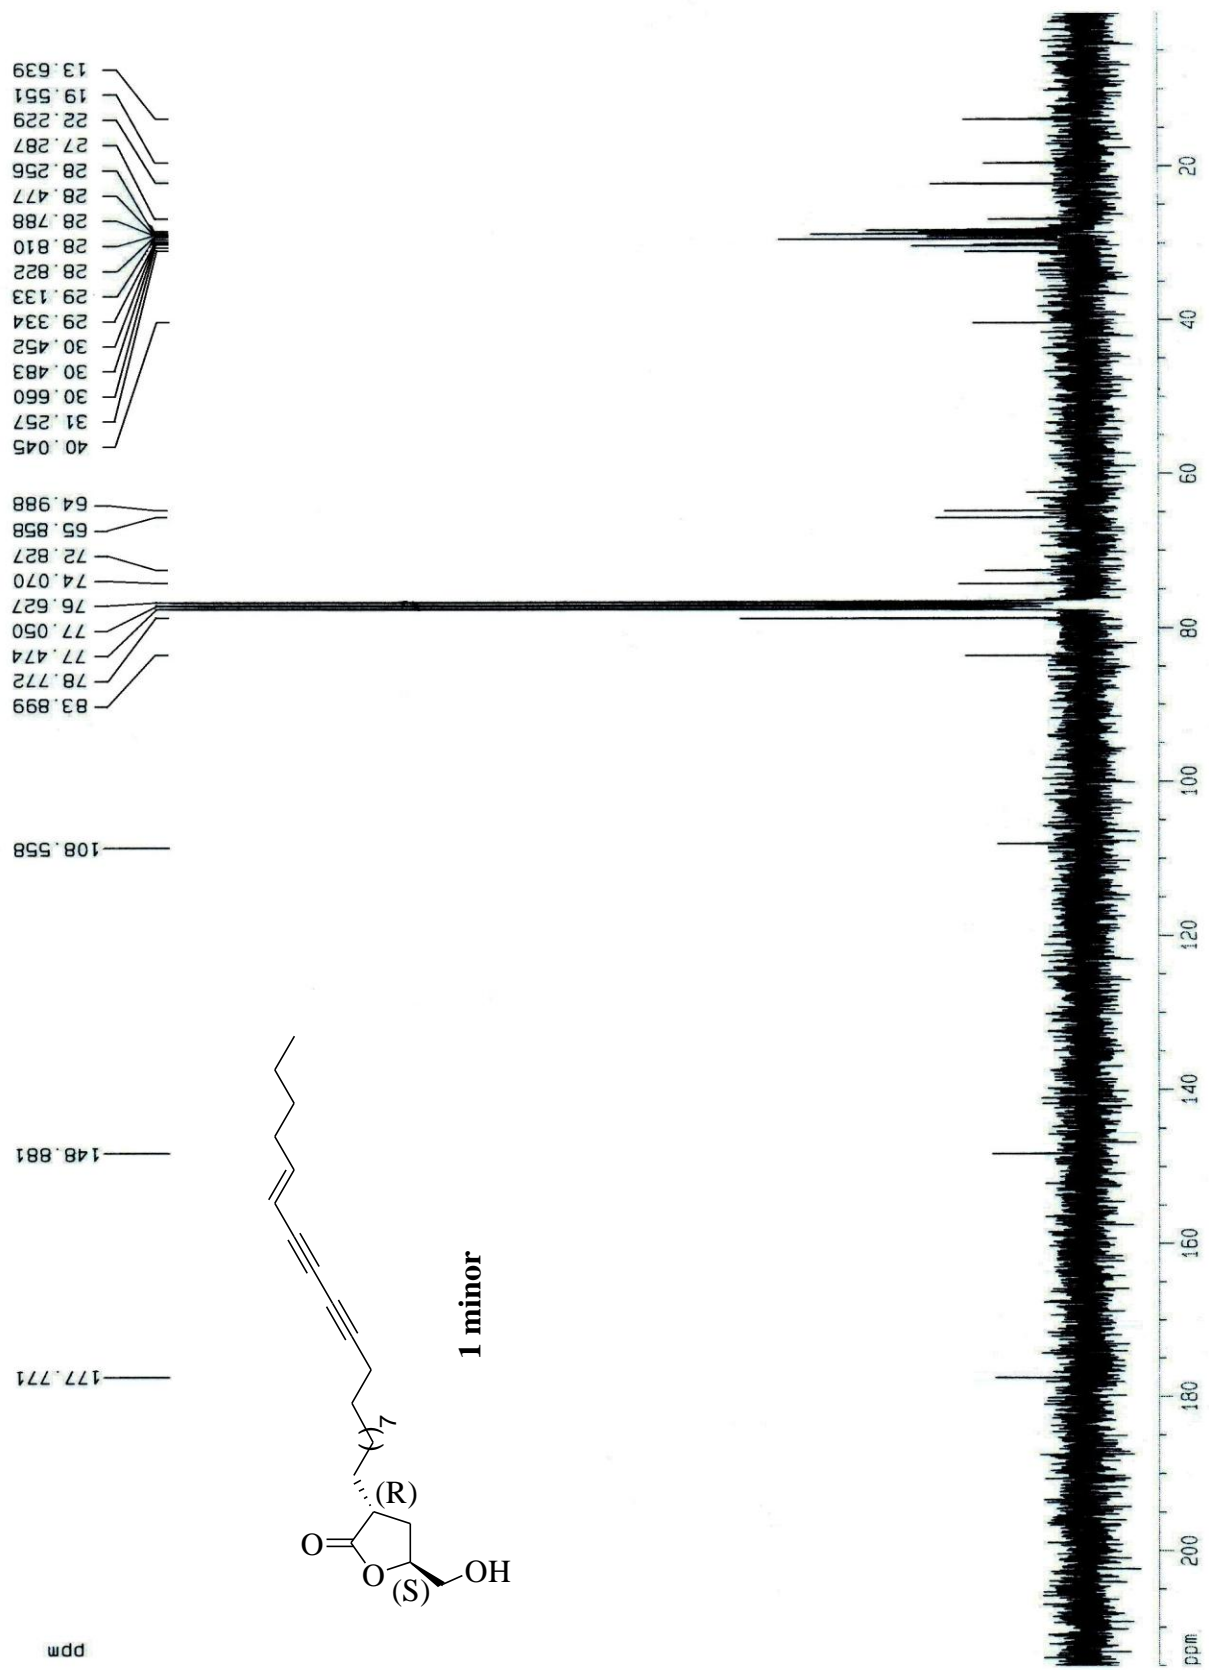

Supplement: c2ob26329g.pdf [file c2ob26329g.pdf]
